1 **The RHIM within the M45 protein from murine cytomegalovirus forms**  
2 **heteromeric functional amyloid fibrils with RIPK1 and RIPK3**

3

4 Chi L. L. Pham<sup>1</sup>, Merryn Strange<sup>1</sup>, Ailis O' Carroll<sup>2</sup>, Nirukshan Shanmugam<sup>1</sup>, Emma  
5 Sierecki<sup>2</sup>, Yann Gambin<sup>2</sup>, Megan Steain<sup>3</sup> and Margaret Sunde<sup>1\*</sup>

6

7 <sup>1</sup>Discipline of Pharmacology, School of Medical Sciences and Sydney Nano, University of  
8 Sydney, NSW 2006, Australia

9 <sup>2</sup>EMBL Australia Node in Single Molecule Sciences, School of Medical Science, University  
10 of New South Wales, NSW 2052, Australia

11 <sup>3</sup>Infectious Diseases and Immunology, Central Clinical School, Sydney Medical School,  
12 University of Sydney, NSW 2006, Australia

13 \*Corresponding author: [margaret.sunde@sydney.edu.au](mailto:margaret.sunde@sydney.edu.au)

14

15

16 **Abstract**

17

18 The M45 protein from murine cytomegalovirus protects infected murine cells from  
19 necroptosis and can protect human cells from necroptosis induced by TNFR activation, when  
20 heterologously expressed. We show that this activity is associated with amyloid formation by  
21 the N-terminal 90 residues of the M45 protein, which contain a RIP Homotypic Interaction  
22 Motif (RHIM). The RHIM of M45 drives self-assembly into homomeric fibrils with the  
23 hallmark characteristics of amyloid and interacts with the RHIMs of host RIPK1 and RIPK3  
24 to form heteromeric amyloid fibrils. These interactions require an intact core tetrad within the  
25 M45 RHIM. The heteromeric amyloid fibrils formed when the M45 RHIM is incorporated  
26 reduces the stability of RIPK1 and RIPK3 RHIM-based fibrillar assemblies. Our results  
27 suggest that M45 mimics the interactions made by RIPK1 with RIPK3. It represents a novel  
28 functional amyloid and anti-RHIM strategy. The entrapment of cellular RHIM-containing  
29 proteins in alternative heteromeric complexes that are unable to perform appropriate  
30 signaling functions may underlie the suppression of RIPK3-associated necroptosis by murine  
31 cytomegalovirus, and other viruses that express RHIM-containing proteins.

32

## 33 **Introduction**

34

35 The RIP homotypic interaction motif (RHIM) was first identified in receptor-interacting  
36 protein kinase 1 (RIPK1) and receptor-interacting kinase 3 (RIPK3)<sup>1</sup>. A RHIM contains 18–  
37 19 amino acids, with a tetrad (V/I)-Q-(V/I/L/C)-G core sequence (Fig. 1a). An intact RHIM  
38 is required for the interaction between RIPK1 and RIPK3 that occurs downstream of tumour  
39 necrosis factor receptor 1 (TNFR1) activation, during the programmed cell death response  
40 known as necroptosis<sup>2,3</sup>. In addition to the TNFR1 pathway that leads to RIPK1:RIPK3  
41 association, two other pathways involving RIPK3 and specific RHIM-containing adapter  
42 proteins can result in necroptosis<sup>4</sup>. Binding of microbial pathogen-associated molecular  
43 patterns to Toll-like receptors 3 and 4 can lead to activation of RIPK3 through formation of a  
44 complex with the RHIM-containing TIR-domain-containing adapter-inducing interferon- $\beta$   
45 protein (TRIF). Additionally, the Z-DNA binding protein/DNA-dependent activator of  
46 interferon regulatory factors (ZBP-1/DAI) is a cytosolic nucleic acid sensor that binds foreign  
47 nucleic acid and acts as the RHIM adapter protein for RIPK3 in viral-induced necroptosis<sup>5-8</sup>.  
48 In all three pathways, oligomerisation and autophosphorylation of RIPK3 occurs after  
49 binding of RIPK3 to the adapter protein. The activation of RIPK3 leads to phosphorylation  
50 and oligomerisation of mixed lineage kinase domain-like protein (MLKL) and this commits  
51 the cell to membrane disruption, ion dyshomeostasis and lytic necrotic cell death<sup>9-12</sup>.

52

53 Necroptosis has essential functions in adult tissue homeostasis and innate immune defence  
54 against intracellular pathogens, however undesirable necroptosis can be triggered by  
55 ischaemic tissue damage<sup>13,14</sup> and recent evidence suggests that necroptosis contributes to  
56 neurodegenerative conditions<sup>15</sup>. Small molecules that block necroptosis are under  
57 investigation as potential modulators of ischaemia-reperfusion injury associated with

58 myocardial infarction, stroke and solid organ transplantation<sup>16</sup>. Solid cancers present with  
59 necrosis but additionally necroptosis can promote tumour cell growth through suppression of  
60 the immune response against cancer<sup>17</sup>. A number of herpesviruses express RHIM-containing  
61 proteins that are primarily implicated in inhibiting host cell necroptosis to ensure virus  
62 survival<sup>18,19</sup>. Understanding the molecular basis for this viral RHIM-driven inhibition could  
63 identify therapeutic targets and provide guidance for the development of anti-necroptosis  
64 strategies with many clinical applications.

65

66 We have characterised the properties of the RHIM-containing protein M45 (Fig. 1a), also  
67 known as the viral Inhibitor of RIP Activation (vIRA)<sup>20</sup> from murine cytomegalovirus  
68 (MCMV) and the structural basis for its interactions with RIPK1 and RIPK3. MCMV inhibits  
69 host apoptosis and necroptosis pathways to sustain infection<sup>21,22</sup> and specifically thwarts  
70 necroptosis in infected endothelial cells and macrophages<sup>23,24</sup> through the actions of M45.  
71 Thus far, M45 is the only viral RHIM-containing protein known to suppress necroptosis in  
72 mouse and human cells<sup>23,25,26</sup>. The M45 protein is delivered within the infecting virions<sup>27</sup>.  
73 Inhibition of necroptosis by M45 has been shown to involve interactions between M45 and  
74 RIPK1<sup>23</sup>, RIPK3<sup>26</sup> and ZBP-1/DAI<sup>7,28</sup> and to require an intact RHIM<sup>7,28</sup>.

75

76 In 2012 Wu and colleagues demonstrated that the RHIM-driven association between RIPK1  
77 and RIPK3 results in the formation of an amyloid, fibrillar structure where the RHIM  
78 residues form the  $\beta$ -sheet core of RIPK1:RIPK3 fibrils<sup>29</sup>. This necrosome complex was the  
79 first functional amyloid structure described with an active signalling role<sup>30</sup> but with the report  
80 of similar amyloid-based signalling platform in *Drosophila*, where the PGRP-LC and PGRP-  
81 LE receptors and downstream Imd adapter protein interact through motifs bearing some  
82 similarity to RHIMs<sup>31</sup>, RHIM-based signalling may be widespread. The structure of the

83 necrosome RIPK1:RIPK3 core has now been determined by solid state nuclear magnetic  
84 resonance spectroscopy (ssNMR), revealing a compact hydrophobic interface and  
85 highlighting the central role of the RHIM tetrad<sup>32</sup>.

86

87 Given the demonstrated ability of the M45 protein to protect against TNFR-initiated  
88 necroptosis in human cells<sup>25</sup> and the interest in inhibition of necroptosis in clinical settings,  
89 we have investigated the interactions between the RHIMs of M45 and human RIPK1 and  
90 RIPK3, which are highly homologous to the murine proteins (Fig. 1a). We find that the  
91 RHIM of M45 is itself amyloidogenic and the ability of M45 to self-assemble into fibrils  
92 depends on the presence of the core sequence IQIG. A 90-residue fragment of M45  
93 encompassing the RHIM confers protection against TNF-driven necroptosis in human cells.  
94 The RHIM of M45 is readily incorporated into heteromeric amyloid fibrils with the minimum  
95 portions of human RIPK1 or RIPK3 that are necessary for necrosome formation<sup>29</sup>. The viral  
96 RHIM preferentially assembles with RIPK3 over RIPK1. We have used the recently  
97 determined structure of the RIPK1:RIPK3 core to propose how M45 could form a hetero-  
98 amyloid structure with RIPK3, in a manner analogous to RIPK1, which has the same IQIG  
99 tetrad sequence. Incorporation of the viral M45 RHIM alters the properties of the human  
100 RHIM-based complexes. These results suggest that the M45 protein sequesters host RHIM-  
101 containing proteins in alternative amyloid structures that are incompatible with auto-  
102 phosphorylation of RIPK3 and/or activation of the downstream necroptosis mediator MLKL.  
103 The ability of the M45 protein revealed here, to form amyloid-based structures with host  
104 RHIM-containing proteins, suggests a general mechanism for modulation of host RHIM-  
105 based signalling by other viral RHIM-containing proteins.

106

## 107 **Results**

108

### 109 **The M45 RHIM drives spontaneous amyloid fibril formation**

110 We initially sought to determine whether the RHIM in M45 was itself able to assemble into  
111 amyloid fibrils. A peptide of 19 residues, corresponding to the M45 RHIM sequence, readily  
112 assembled into long fibrils with amyloid morphology (Fig. 1a, b). In order to investigate the nature  
113 of the interactions between M45 and host proteins, we prepared fusion proteins containing portions  
114 of M45, RIPK1 and RIPK3 (Fig. 1a) with different partner proteins (His<sub>6</sub>-ubiquitin (His-Ub), His<sub>6</sub>-  
115 YPet, -ECFP or -mCHERRY fluorescent proteins (FPs) or maltose binding protein (MBP)). The  
116 human RIPK protein constructs contained the minimum RHIM-containing regions shown to support  
117 interactions between these two proteins, i.e. RIPK1-(497-583) and RIPK3-(387-518)<sup>29</sup>. Two RHIM-  
118 encompassing fragments of M45 were tested, comprising 90 or 277 N-terminal residues of the viral  
119 protein. The 1–90 region of M45 was identified as a likely autonomous fragment because analysis  
120 of the predicted secondary structure of the protein highlighted a clear boundary between the β-sheet  
121 elements flanking the RHIM and the strongly predicted helical elements from residue 93 onwards.  
122 The 277 N-terminal residues of M45 have previously been shown to provide protection against  
123 some forms of cell death<sup>23</sup> and to inhibit ZBP-1 signalling<sup>7</sup>.

124

### 125 **RHIM-encompassing fragments of M45 inhibit necroptosis in human HT-29 cells**

126 We compared the ability of the 1–90 and 1–277 regions of M45 to protect against TNFR-induced  
127 necroptosis in human HT-29 cells. The 90-residue and 277-residue portions were expressed as  
128 fusion proteins with the B subunit of *E. coli* DNA gyrase<sup>9</sup>. Addition of the antibiotic coumermycin  
129 A1 can induce dimerization of the gyrase subunit, to substitute for the potential dimerisation of the  
130 inactive ribonucleotide reductase-like (RNR1-like) domain of M45, which may form a heterodimer  
131 with RNR large and small subunits in the intact viral protein. Fig. 1c shows that the 90-residue and  
132 277-residue portions of M45 protect human cells from TNFR-induced necroptosis through the

133 RIPK1:RIPK3 pathway to a similar extent, and this is independent of the addition of coumermycin  
134 A1. Dimerisation of M45 is therefore unlikely to be necessary for its role in inhibition of host cell  
135 death. For the majority of biophysical experiments we have therefore probed RHIM-driven  
136 interactions using the minimum necrosome-forming regions of RIPK1 and RIPK3<sup>29</sup> and the 90-  
137 residue N-terminal portion of M45.

138

### 139 **The wild type core tetrad is critical for amyloid formation by M45 and RIPK1 but not RIPK3**

140 The RHIM-containing regions were expressed as fusion proteins with His-Ub or His-FP to improve  
141 expression yields and to provide a means to study the kinetics of amyloid assembly. These fusion  
142 proteins were purified in the presence of denaturant, which prevented unwanted self-assembly. Prior  
143 experience with other functional amyloid-forming proteins has demonstrated that upon dilution of  
144 the denaturant, the ubiquitin domain refolds independently to its native state, allowing the  
145 characteristics of the partner sequence to be studied<sup>33</sup>. In YPet, ECFP and mCHERRY-containing  
146 RHIM fusion proteins, the fluorescent partner refolded correctly, as judged by recovery of  
147 characteristic fluorescence profiles. Purified His-Ub-M45<sub>1-90</sub> spontaneously formed fibrils upon  
148 removal of denaturant by dialysis and the fibrils displayed a cross- $\beta$  X-ray fibre diffraction pattern,  
149 with a strong, sharp meridional reflection at 4.7 Å and a weaker, diffuse equatorial reflection at  
150  $\sim$ 10.5 Å, which are characteristic of amyloid fibrils<sup>34</sup> (Fig. 2a).

151

152 The kinetics of self-assembly, or homomeric fibril formation, of the RHIM-containing fusion  
153 proteins were studied by monitoring the fluorescence of thioflavin T (ThT), a dye commonly used  
154 as an indicator of amyloid structure. ThT exhibits increased fluorescence emission at 485 nm when  
155 it binds to amyloid fibrils<sup>35</sup>. All wild type RHIM-containing His-Ub and fluorescent fusion proteins  
156 formed homomeric amyloid (Fig. 2b). Tetra-alanine substitution of the RHIM core is a commonly  
157 used strategy to probe the role of RHIM:RHIM interactions in cells and during viral infection<sup>1,23</sup>  
158 (Fig. 1a). RHIM mutant constructs in which the four core amino acids were substituted by AAAA

159 were produced and the ability of these proteins to assemble into homomeric amyloid fibrils was  
160 tested. The substitution of the IQIG tetrad by AAAA within the M45<sub>1-90</sub> and RIPK1<sub>497-583</sub> RHIM  
161 constructs abolishes amyloid assembly (Fig. 2b). In contrast, the AAAA version of RIPK3<sub>387-518</sub>  
162 retains the ability to assemble into amyloid fibrils and has a similar kinetic profile to the WT form  
163 but exhibits a reduced ThT fluorescence intensity, reflecting an alteration in the fibril structure. This  
164 result indicates that in RIPK3, interactions outside of the core four residues are also important in the  
165 formation of homomeric amyloid structures.

166

### 167 **The M45 RHIM forms the core structure within the amyloid fibrils**

168 Amyloid assembly by the RHIM-containing fragments was also characterised under native  
169 conditions, when amyloid assembly occurred spontaneously during recombinant expression. When  
170 M45<sub>1-90</sub>, RIPK1<sub>497-583</sub> and RIPK3<sub>387-518</sub> were expressed as fusions with MBP, the fusion proteins  
171 remained soluble and could be purified under native conditions. Size exclusion chromatography  
172 after affinity purification separated the material into two main fractions (Fig. 2c). The first of these  
173 eluted in the void volume, indicating the formation of structures with MW >100 000 Da. SDS  
174 PAGE showed that the peak eluting in the void volume contained MBP-RHIM fusion protein while  
175 the second peak contained MBP only. The high molecular weight material was examined by  
176 negative stain transmission electron microscopy (TEM) and for MBP-M45<sub>1-90</sub>, MBP-RIPK1<sub>497-583</sub>  
177 and MBP-RIPK3<sub>387-518</sub>, fibrillar structures of up to ~200 nm in length were observed (Fig. 2d).  
178 Congo red solution binding assays performed with this material showed increased absorbance at  
179 540 nm for all three samples and a shift in the absorbance maxima, relative to a non-amyloid  
180 control (soluble insulin), indicating that the fibrils had an amyloidogenic nature (Fig. 2e).

181

182 To probe the arrangement of the RHIM within the fibrils, we treated the fibrillar material with  
183 thrombin to cleave specifically between MBP and the RHIM-containing regions. During incubation  
184 with the protease, insoluble material became visible in all three samples. Separation of this material



185 from the soluble fraction by centrifugation, followed by SDS PAGE and SEC analysis of the  
186 soluble material, revealed that M45<sub>1-90</sub>, RIPK1<sub>497-583</sub> and RIPK3<sub>387-518</sub> had formed insoluble  
187 precipitates while the MBP remained soluble. The insoluble material was resuspended and  
188 examined by TEM and fibrils were observed that were longer and thinner than those formed by the  
189 MBP fusion proteins (Fig. 2f). These results indicate that the RHIM-containing region of M45 is  
190 amyloidogenic and forms the  $\beta$ -sheet core structure of the fibrils, in a similar fashion to that  
191 demonstrated for RIPK1 and RIPK3 by Wu and coworkers<sup>29</sup>. The MBP fusion partner is arrayed on  
192 the outside of the  $\beta$ -sheet core and limits the growth of the fibrils to ~200 nm; in its absence, the  
193 RHIM-containing segments assemble into longer fibrils.

194

#### 195 **M45 interacts with RIPK1 and RIPK3 to form heteromeric assemblies**

196 To address the interactions between the RHIM-containing portions of M45, RIPK1 and RIPK3, we  
197 applied fluorescence polarisation and co-localisation experiments. When His-Ub-RIPK1<sub>497-583</sub> was  
198 covalently labelled with Alexa Fluor488 and mixed with unlabelled His-Ub-RIPK1<sub>497-583</sub>, His-Ub-  
199 RIPK3<sub>387-518</sub> or His-Ub-M45<sub>1-90</sub> in a ratio of 1 labeled:1999 unlabelled, the Alexa488-labelled  
200 RIPK1<sub>497-583</sub> was incorporated into growing His-Ub-RIPK1<sub>497-583</sub>, His-Ub-RIPK3<sub>387-518</sub> or His-Ub-  
201 M45<sub>1-90</sub> fibrils (Fig. 3a). The rates of incorporation of the RIPK1-RHIM construct into His-Ub-  
202 RIPK1<sub>497-583</sub> and His-Ub-RIPK3<sub>387-518</sub> fibrils were similar and RIPK1-RHIM was incorporated into  
203 His-Ub-M45<sub>1-90</sub> fibrils more slowly. The tetrad sequence in the RHIM of M45 is IQIG and identical  
204 to that in RIPK1, whereas the RIPK3 tetrad sequence is VQVG. The observed difference in  
205 incorporation rates indicates that residues outside the tetrad also influence the interactions between  
206 RHIM-containing proteins (Fig. 1a). Taken together with the observed different effects of the  
207 AAAA mutations on M45, RIPK1 and RIPK3 homomeric amyloid formation, we conclude that the  
208 contributions of the tetrad sequences to homomeric and heteromeric structures are distinct and  
209 differ between RHIM-containing proteins.

210

211 Fluorescence co-localisation experiments were applied to detect RHIM-based hetero-oligomers  
212 against a background of monomeric proteins and the potential competing formation of homo-  
213 oligomers<sup>36,37</sup>. In these experiments, multiple different RHIM-containing fusion proteins were  
214 mixed together and maintained in monomeric form in 8 M urea-containing buffer. Assembly or co-  
215 assembly were initiated by reduction of the urea concentration through dilution. Mixtures of YPet-  
216 and mCHERRY-tagged proteins were examined in solution, using a confocal microscope where the  
217 lasers create a very small confocal volume (~250x250x800 nm). Freely diffusing fluorophore-  
218 tagged proteins are only excited and detected when they are within the confocal volume (Fig. 3b).  
219 The number of molecules in the focal volume/millisecond over the range of concentrations used  
220 was ~10-500.

221

222 In initial fluorescence spectroscopy experiments, we analysed mixtures of YPet- and mCHERRY-  
223 tagged RIPK1<sub>497-583</sub> or YPET- and mCHERRY-tagged RIPK3<sub>387-518</sub>. We observed coincidence of  
224 the signals from both fluorophores when oligomers formed, demonstrating that homomeric fibril  
225 assembly can be detected in this way (Fig. 3c,d). Mixtures of mCHERRY-RIPK1<sub>497-583</sub> and YPet-  
226 RIPK3<sub>387-518</sub> exhibited formation of heteromeric fibrils, indicated by coincidence of the signals from  
227 the two fluorophores attached to different RHIM-containing constructs (Fig. 3e). In addition, FRET  
228 could be observed between YPet and mCHERRY within the fibrils (Fig. 3f). These results provide  
229 the first direct single-molecule-level evidence for the formation of heteromeric fibrils containing  
230 RIPK1 and RIPK3 RHIM sequences, supporting the results from bulk solution previously  
231 reported<sup>29</sup>. The RIPK3<sub>387-518</sub> construct demonstrated a greater propensity to self-assemble than the  
232 RIPK1<sub>497-583</sub> construct, as evidenced by the formation of larger assemblies (Fig. 3c,d). In addition,  
233 all oligomeric RIPK1<sub>497-583</sub> appeared coincident with RIPK3<sub>387-518</sub> material, while some  
234 RIPK3<sub>387-518</sub>-only fibrils were observed (Fig. 3e).

235

236 The self-assembly of M45<sub>1-90</sub>WT into fibrils could be detected by fluorescence co-localisation but  
237 substitution of the IQIG tetrad with AAAA abolished the ability of this M45 fragment to self-  
238 assemble (Fig. 4a,b). This was confirmed by electron microscopy, which detected the presence of  
239 long fibrils formed by M45<sub>1-90</sub>WT-mCHERRY and only amorphous clusters in the M45<sub>1-90</sub>AAAA-  
240 mCHERRY sample (Supplementary Fig. 1). When M45<sub>1-90</sub>WT-mCHERRY and YPet-RIPK1<sub>497-583</sub>  
241 or YPet-RIPK3<sub>387-518</sub> were mixed under fibril assembly conditions, we observed coincidence of the  
242 M45<sub>1-90</sub>WT with both RIPK fragments, demonstrating heteromeric complex formation between viral  
243 and host RHIM-containing fragments (Fig. 4c,d). The complexes containing M45<sub>1-90</sub> and  
244 RIPK3<sub>387-518</sub> appeared larger than those containing M45<sub>1-90</sub> and RIPK1<sub>387-518</sub>, as judged by the  
245 length of time taken by the heteromeric complexes to diffuse through the focal volume. The AAAA  
246 mutation of the core tetrad of M45 abolished co-assembly with RIPK1 and RIPK3 (Fig. 4e,f).

247  
248 We added non-fluorescent His-Ub-M45<sub>1-90</sub> into mixtures of YPet- and mCHERRY-tagged RIPK1  
249 and RIPK3 fragments, to probe the effect of the amyloidogenic viral RHIM on heteromeric  
250 complex formation by the two human RHIMs. The number of times a large complex generating  
251 >5000 or >10000 photons above baseline intensity was detected in the focal volume for 1  
252 millisecond during the last 200 seconds of a 10-minute incubation was quantified for a  
253 RIPK1:RIPK3 mixture and a series of RIPK1:RIPK3:M45 mixtures. The addition of His-Ub-  
254 M45<sub>1-90</sub> resulted in a decrease in the number of the large complexes detected, correlated with the  
255 relative concentration of His-Ub-M45<sub>1-90</sub> (Fig. 4g). EM of samples formed with increasing amounts  
256 of M45<sub>1-90</sub> relative to RIPK3<sub>387-518</sub> (1:1; 2:1 and 4:1) confirmed an increase in the size of the  
257 fibrillar assemblies (Supplementary Fig. 2). The reduction in the number of large complexes  
258 detected is therefore likely due to a reduction in the rate at which larger complexes diffuse in the  
259 well, which results in fewer passes through the focal volume and hence detection. Collectively,  
260 these results show that M45<sub>1-90</sub> is able to interact with RIPK1<sub>497-583</sub> and RIPK3<sub>387-518</sub> in a RHIM-  
261 dependent manner but displays a preference for co-assembly with the RHIM of RIPK3.

262

263 **The M45-RHIM alters the formation of fibrils by the RHIMs of RIPK1 and RIPK3**

264 Self-assembly of single types of RHIM-containing proteins resulted in predominantly unbranched  
265 single fibrils, as visualised by TEM (Fig. 5a). In contrast, when the M45<sub>1-90</sub> fragment was mixed  
266 with either of the RIPK1<sub>497-583</sub> or RIPK3<sub>387-518</sub> fragments in a 1:1 molar ratio under conditions  
267 allowing fibril assembly, extensive fibrillar networks were observed (Fig. 5a). These consisted of  
268 large bundles of multiple fibrils that branched and reformed in different combinations, resulting in  
269 an interweaved and dense assembly covering large areas of the TEM grids. By contrast, when  
270 RIPK1<sub>497-583</sub> and His-Ub-RIPK3<sub>387-518</sub> were mixed together under conditions allowing fibril  
271 assembly, isolated mostly single fibrils of <200 nm length were observed, similar to those reported  
272 by Li et al (2012). When M45<sub>1-90</sub> or RIPK1<sub>497-583</sub> were allowed to assemble in the presence of an  
273 unrelated protein with the same fusion partner, His<sub>6</sub>-Ub-RodA, no thick multi-fibril bundles were  
274 observed, suggesting that this is a feature associated with hetero-fibrils formed by two RHIM-  
275 containing proteins (Supplementary Fig. 3).

276

277 The different RHIM-containing components cannot be distinguished in these TEM images so we  
278 used confocal microscopy to visualise fibrils formed from mixtures of RHIM-containing fluorescent  
279 fusion proteins (Fig. 5b–e). We observed the formation of long fibrils that contained M45<sub>1-90</sub> and  
280 either one or both of human RIPK1<sub>497-583</sub> or RIPK3<sub>387-518</sub>. These assemblies are thioflavin T  
281 positive, confirming that these large heteromeric assemblies do have a cross- $\beta$  substructure  
282 (Supplementary Fig. 4). Fibrils prepared from a mixture containing mCHERRY-M45<sub>1-90</sub> and YPet-  
283 RIPK3<sub>387-518</sub> were additionally imaged by super-resolution microscopy and transmission electron  
284 microscopy to provide higher resolution images. We found that the viral and host RHIMs were  
285 distributed throughout the fibrillar protein network formed by these proteins (Fig. 5f,g).

286

287 **The incorporation of M45 RHIM alters fibril stability**

288 We reasoned that the incorporation of the viral M45 RHIM into host heteromeric fibrils might alter  
289 the properties of the fibrils, in addition to changing the morphology of the aggregates. Other studies  
290 of functional amyloid fibrils have noted that they are less resistant to treatment with the detergent  
291 sodium dodecyl sulphate (SDS) than some disease-associated amyloid fibrils<sup>38,39</sup>. We prepared  
292 homomeric and heteromeric assemblies from M45<sub>1-90WT</sub> and M45<sub>1-90AAAA</sub> with RIPK3<sub>387-518</sub>. These  
293 assemblies were incubated with and without SDS, and then the preparations were analysed by  
294 agarose gel electrophoresis (AGE) (Fig. 6). This separated the material into (1) very large SDS-  
295 resistant fibrillar material that remained in the wells, (2) ThT-positive soluble amyloid oligomers  
296 and (3) monomeric protein. The M45<sub>1-90WT</sub> and RIPK3<sub>387-518</sub> mixtures contained soluble amyloid  
297 oligomers. The incorporation of the viral RHIM destabilised the complexes such that treatment with  
298 2% SDS resulted in release of both constructs in monomeric form and, in the 1:1 mixtures, the  
299 generation of RIPK3-only fibrils. RIPK3-only fibrils were predominantly SDS-resistant and  
300 remained as large fibrils trapped in the wells (Fig. 6a). When the viral M45 RHIM was present in  
301 four-fold molar excess, little RIPK3-only fibrillar material remained in the wells. These results were  
302 supported by analysis of the soluble and insoluble material generated by dialysing mixtures of  
303 RHIM-containing constructs together, which showed that the presence of the M45<sub>1-90WT</sub> fragment  
304 reduced the amount of RIPK3<sub>387-518</sub> that was detected in the insoluble fraction (Supplementary Fig.  
305 5). This activity of the M45 RHIM was dependent on the presence of the WT tetrad core sequence,  
306 as in the presence of M45<sub>1-90AAAA</sub>, a large amount of SDS-resistant RIPK3-only material remained  
307 in the wells and very low levels of monomeric RIPK3<sub>387-518</sub> were detected, even with four times as  
308 much M45<sub>1-90AAAA</sub> (Fig. 6a). The M45<sub>1-277</sub> construct displayed a similar activity (Fig. 6b). It self-  
309 assembled into soluble homo-oligomers. It co-migrated with RIPK1<sub>497-583</sub> but interacted strongly  
310 with RIPK3<sub>387-518</sub> as judged by the narrow, intense orange-coloured co-localised band  
311 corresponding to soluble oligomers. In the absence of the intact RHIM core, M45<sub>1-277AAAA</sub> formed  
312 large soluble oligomers with a wide mobility range but was unable to interact with RIPK1<sub>497-583</sub> or  
313 RIPK3<sub>387-518</sub>. Independently migrating oligomers of RIPK1<sub>497-583</sub> and large RIPK3-only homo-

314 oligomeric fibrils were observed (Fig. 6b). These results indicate that the M45 RHIM can compete  
315 with, and prevent, homo-oligomerisation of RIPK3-containing oligomers, such as those found in  
316 necrosomes.

317

318

319

320 **Discussion**

321

322 These results indicate that the RHIM within the MCMV M45 protein is amyloidogenic and the  
323 ability of M45 to self-assemble into homomeric fibrils or to form heteromeric amyloid-structured  
324 complexes with RIPK1 and RIPK3 depends on the presence of the core tetrad sequence IQIG  
325 within the RHIM. The N-terminal 90 residues of M45 are sufficient to support interactions with the  
326 RHIMs of human RIPK1 and RIPK3 and to protect against TNFR-mediated necroptosis in human  
327 cells *in vitro*. When probed with necroptosis-relevant RHIM-containing protein fragments, the viral  
328 RHIM preferentially interacts with the RIPK3 RHIM over the RIPK1 RHIM. In the presence of the  
329 M45 RHIM, a RHIM-encompassing region of RIPK3 is incorporated into metastable heteromeric  
330 fibrils rather than into SDS-resistant homo-oligomers. The RIPK1:RIPK3 interaction and formation  
331 of the necrosome is central to TNFR-mediated responses if caspase-8 is inhibited by viral or  
332 chemical inhibitors<sup>3</sup>. We propose that the presence of M45 in cells results in the trapping of RIPK1  
333 and RIPK3 within alternative heteromeric “decoy” amyloid structures and prevents the native  
334 RIPK1:RIPK3 RHIM-based amyloid interactions that are required to trigger cell death.

335

336 An important difference between RHIM-based amyloids and other disease-associated or most  
337 functional amyloids is the formation of heteromeric assemblies<sup>30</sup>. Heteromeric RHIM-based  
338 amyloid is central to necroptosis induction<sup>11</sup>. RNA-binding proteins containing low complexity  
339 sequences have the capacity to co-assemble into phase-separated droplets and hetero-fibrils, driven  
340 by intermolecular interactions between the prion-like domains, however the *in vivo* significance of  
341 heteromeric fibril assembly by these proteins is currently less clear than is the case for RHIM-based  
342 amyloid<sup>38,39</sup>. The multi-protein RHIM amyloid structures are similar to other higher-order  
343 assemblies such as signalosomes, that form by polymerization and recruit multiple proteins with  
344 different activities<sup>40</sup>.

345

346 The key features of the heteromeric RIPK1:RIPK3 necrosome core have now been revealed by  
347 ssNMR<sup>32</sup>. The RHIMs of RIPK1 and RIPK3 adopt a serpentine fold and form parallel  $\beta$ -sheets  
348 through intermolecular hydrogen binding. Two such sheets assemble to form a fibril through inter-  
349 tetrad and other interactions, which generate an oblong-shaped hydrophobic core (Fig. 6c). The  
350 structure is also stabilised by solvent-exposed side-chain-side-chain hydrogen bonds between  
351 stacked Asn and Gln residues, and Tyr and Ser/Thr side chains that form stacked ladder-like  
352 interactions on the periphery of the core.

353

354 We have used this structure to model the incorporation of the RHIM of M45. Since M45 and  
355 RIPK1 have the same core IQIG tetrad sequence, and we have determined that M45 preferentially  
356 forms heteromeric fibrils with RIPK3 over RIPK1, we have mutated the RIPK1 sequence to that of  
357 M45 and residue substitutions were made without significant steric clashes (Fig. 6d). The core  
358 tetrad interactions therefore are unchanged from those in the RIPK1:RIPK3 structure but with the  
359 viral protein, two Tyr and one Asn ladder are not possible. Instead, a new Asp-Asn side-chain  
360 interaction is likely and in the M45:RIPK3 structure, a Val-Cys ladder takes the place of the Ser-  
361 Cys ladder observed with RIPK1:RIPK3. Our model suggests that the M45:RIPK3 RHIM core will  
362 be similar to that formed by RIPK1:RIPK3 and that M45 mimics the host inter-RHIM interactions.  
363 It is in line with our experimental observation that the AAAA mutation to M45 abolishes the ability  
364 of this protein to form a hetero-amyloid with the RHIM of RIPK3. Our experimental data strongly  
365 indicate that the interactions driving M45:RIPK3 heteromeric assembly are stronger than those  
366 driving M45:RIPK1 or RIPK1:RIPK3 assembly. The ssNMR-derived structure does not reveal  
367 potential heteromeric interactions between polypeptides that occupy the corresponding “rung” of  
368 opposing sheets. It is possible that the viral protein could be involved in such interactions with host  
369 partners. Interference by the viral protein with inter-sheet interactions would explain the branching  
370 and network morphology we observe in our heteromeric assemblies (Fig. 5a,f; Supplementary Fig.  
371 2). The concentration of viral protein in the cell may also influence the make-up of the RHIM-based



372 structures within cells, and hence control the final cellular outcome. The structure determined by  
373 Mompean *et al.* is also consistent with confocal images we have collected of isolated RHIM fibrils,  
374 which show fluorescent proteins along the two flanks of the fibril and a dark central core. This  
375 organisation of fluorescent partner proteins is only consistent with an opposing arrangement of two  
376 parallel  $\beta$ -sheets (Fig. 6e,f).

377

378 It is noteworthy that in our experiments the AAAA mutation of the core tetrad in RIPK3<sub>387-518</sub> does  
379 not abolish self-assembly into an amyloid structure while this mutation in RIPK1<sub>497-583</sub> and M45<sub>1-90</sub>  
380 prevents self-assembly. This indicates that residues outside the tetrad of RIPK3 can support  
381 oligomerisation but these remain to be identified by further mutagenesis and structural studies of the  
382 entire RIPK3 RHIM. Although calculations based on the RIPK1:RIPK3 core structure suggest that  
383 RIPK3:RIPK3 homo-amyloid formation is less favourable than RIPK1:RIPK3 or RIPK1:RIPK1<sup>32</sup>,  
384 the formation of the RIPK1:RIPK3 necrosome is known to nucleate further polymerisation of  
385 RIPK3 that leads to activation of RIPK3 and interaction with MLKL<sup>41</sup>. It will be important to  
386 determine whether the entrapment of RIPK3 by M45 in alternative assemblies prevents RIPK3  
387 auto-phosphorylation and/or if it prevents the subsequent recruitment and activation of MLKL  
388 which leads to MLKL oligomerisation and membrane lysis<sup>42</sup>. The results of other studies suggest  
389 that the former mechanism may operate. M45 prevents ZBP1-induced RIPK3 phosphorylation<sup>7</sup> and  
390 autophosphorylation of RIPK3 when co-expressed in 293Ts<sup>43</sup> (Huang 2015 CHM). HSV-1 and -2  
391 encode RHIM-containing proteins, ICP-6 and ICP10, which have been shown to protect against  
392 necroptosis in human cells<sup>25,44</sup> and ICP10 expression is known to prevent phosphorylation of  
393 RIPK1 and RIPK3 compared to control<sup>25</sup>. Notably, in our results, the effect of the M45 RHIM is to  
394 sequester RIPK1 and RIPK3 RHIM-containing fragments in amyloid-based assemblies that are  
395 persistent but not as stable as RIPK1:RIPK3 fibrils. Any decoy amyloids involving M45 and host  
396 RHIM-containing proteins should not trigger other host defense or cytotoxic mechanisms that  
397 would be undesirable for continued viral infection of the cell.

398

399 An alternative to the viral RHIM sequestration studied here has been adopted by some bacterial  
400 pathogens. Enteropathogenic *E. coli* (EPEC) is a gut pathogen that has been shown to encode a  
401 protease, EspL, that is delivered through the type III secretion effector system and which rapidly  
402 cleaves within the RHIM of RIPK1, RIPK3, ZBP-1/DAI and TRIF in non-fibrillar forms of these  
403 proteins<sup>45</sup>. Amyloid fibril formation by endogenous RHIM-containing proteins protects them from  
404 cleavage by EspL. Thus EspL appears to act by disabling the amyloid-based RHIM host defense  
405 pathways that would otherwise curtail infection<sup>45</sup>.

406

407 Several different RHIM:RHIM interactions also occur in the absence of infection. An intact RHIM  
408 in RIPK1 suppresses undesirable ZBP-1:RIPK3 interactions during development that would lead to  
409 necroptosis<sup>46,47</sup> and ZBP-1 mediates RIPK3-dependent necroptosis in HT29 cells<sup>48</sup>. The methods  
410 we have developed to probe and compare competing RHIM interactions can be applied to determine  
411 the full extent of the interface involved in heteromeric interactions and to test the relative strengths  
412 of different RHIM:RHIM interactions. This will lead to elucidation of the basis for cellular control  
413 of these potentially competing RHIM:RHIM interactions. Necroptosis is increasingly recognized in  
414 pathophysiological processes including ischaemia-reperfusion injury, and inflammation of the skin  
415 and intestinal epithelium<sup>13,49</sup>. Any development of therapies that target the necroptosis pathway will  
416 benefit from a molecular-level understanding of the structure and regulation of the multiple RHIM-  
417 based interactions that are important in human health and disease.

418

419

420 **Acknowledgements**

421

422 The work was supported by funds provided by Australian Research Council Discovery Project  
423 Grants DP150104227 and DP180101275 to M. Sunde. M. Steain was supported by National Health  
424 and Medical Research Council funding to Prof. Allison Abendroth and The University of Sydney  
425 Bridging Grant scheme. The authors acknowledge the facilities and the scientific and technical  
426 assistance of Sydney Microscopy & Microanalysis at the Australian Centre for Microscopy &  
427 Microanalysis at the University of Sydney. We thank Dr Louise Cole of the Bosch Institute  
428 Advanced Microscopy Facility for assistance with collection of confocal images, staff from the  
429 Bosch Institute Molecular Biology Facility for use of equipment, Charles Collyer for use of the  
430 X-ray generator, Sue McLennan for providing the HT-29 adenocarcinoma cells and James Murphy  
431 for providing the *E.coli* DNA gyrase subunit B. We thank Nicholas Della Marta, Monique Fischer,  
432 Laura Lau and Jake Campbell for preliminary experiments with RHIM peptides and cloning of  
433 fluorescent proteins. We thank Pascal Krotee and David Eisenberg for helpful discussions about the  
434 use of fluorescent proteins for studying RHIM interactions and models of heteromeric and  
435 homomeric amyloids, respectively.

436

437

## 438 Figure Legends

### 439 **Figure 1. The M45 RHIM is amyloidogenic and 1-90 and 1-277 regions of M45 confer**

440 **protection against TNF-induced necroptosis in human cells.** (a) Schematic representation of

441 M45, RIPK1 and RIPK3 proteins. Grey regions indicate RHIM-encompassing fragments used in

442 this study. Black bar represents 19-residue RHIM. RNR-like represents inactive ribonucleotide

443 reductase domain, DD represents the RIPK1 death domain. Amino acid sequences of the RHIMs of

444 M45 and human and mouse RIPK1 and RIPK3, boxed region indicates the core tetrad that is

445 substituted with AAAA in mutant protein constructs. (b) Negatively-stained transmission electron

446 micrograph of fibrils formed by a synthetic peptide encompassing the M45 RHIM. Three samples

447 were examined by microscopy. (c) HT29 cell survival 18h after treatment with TNF+BV-6+z-

448 VAD-fmk to induce necroptosis. Cells expressed lentivirus constructs encoding 1-90 or 1-277

449 fragments of M45 and were cultured +/- the addition of coumermycin A1 to induce dimerisation.

450 N=2 for M45-90 gyrase and 3 for M45-277 gyrase. Error bars represent SEM, \*\*\*\* = p<0.0001.

### 451 **Figure 2. The RHIM-containing fragment forms the amyloid fibril core.** (a) X-ray fibre

452 diffraction pattern collected from fibrils formed by His-Ub-M45<sub>1-90</sub>. Two different samples were

453 examined by XRFD. (b) Thioflavin T fluorescence as a function of time, following dilution of WT

454 or AAAA His-Ub-M45<sub>1-90</sub>, mCHERRY-RIPK1<sub>497-583</sub>, and YPet-RIPK3<sub>387-518</sub> from 8 M-containing

455 buffer to 100–300 mM urea. Buffer sample contains ThT but no protein. Samples were tested in

456 triplicate and solid line is the average of the triplicates and the error bars (in grey) represent +/-

457 SEM. (c) Size exclusion chromatography (SEC) of MBP-M45<sub>1-90</sub>, MBP-RIPK1<sub>497-583</sub>, and MBP-

458 RIPK3<sub>387-518</sub> following amylose affinity purification. Grey oval indicates high MW material eluting

459 in void volume. (d) Negatively-stained transmission electron micrograph of material eluted in the

460 void volume. These are representative micrographs of the material observed. All fusion proteins

461 expressed and purified at least twice. (e) Absorbance spectrum from solutions containing Congo red

462 with soluble monomeric insulin, insulin amyloid fibrils or material eluted in the void volume

463 containing MBP-M45<sub>1-90</sub> (green), MBP-RIPK1<sub>497-583</sub> (cyan), or MBP-RIPK3<sub>387-518</sub> (blue).

464 Experiment conducted once. (f) Representative images of insoluble material generated after

465 treatment with thrombin removed the MBP. Experiment repeated three times.

### 466 **Figure 3. Assembly of RHIMs gives rise to homomeric and heteromeric structures.** (a)

467 Fluorescence polarization profiles indicating the rate of incorporation of Alexa488-tagged

468 RIPK1<sub>497-583</sub> into unlabeled M45<sub>1-90</sub> (green), RIPK1<sub>497-583</sub> (cyan), or RIPK3<sub>387-518</sub> (blue), with

469 labeled:unlabeled protein at 1:1999. The average polarization profile from triplicate readings is

470 shown, with s.d. indicated. (b) Schematic representation of fluorescence spectroscopy experiments

471 used to detect the formation of homo- and heteromeric amyloid fibrils. Fusion proteins containing

472 RHIMs and different fluorescent partners are mixed together under assembly-permissive conditions

473 and examined in the confocal volume. Co-assembly of two different fluorophores within one

474 complex results in detection of coincident signals in the two channels. (c) Representative

475 fluorescence intensity trace showing homomeric assembly over 40 s in a mixture of mCHERRY-

476 RIPK1<sub>497-583</sub> and YPet-RIPK1<sub>497-583</sub>. (d) Representative fluorescence intensity trace showing

477 homomeric assembly over 40 s in a mixture of mCHERRY-RIPK3<sub>387-518</sub> and YPet-RIPK3<sub>387-518</sub>.

478 (e) Representative fluorescence intensity trace showing heteromeric assembly over 40 s in a mixture

479 of mCHERRY-RIPK1<sub>497-583</sub> and YPet-RIPK3<sub>387-518</sub>. Inset is expansion of region indicated by \* on

480 main trace. (f) Förster resonance energy transfer (FRET) signal between YPet- and mCHERRY

481 fluorophores, detected with excitation by 488 nm laser only. All mixtures examined in at least three

482 different experiments on three separate occasions. In panels c–f the signal from the mCHERRY-

483 tagged protein is coloured magenta and the signal from the YPet-tagged protein is coloured green.

484

485

486 **Figure 4. Heteromeric amyloid formation including M45 RHIM requires intact core tetrad.**  
487 Representative fluorescence intensity traces collected over 50 s for mixtures of (a) mCHERRY-  
488 M45<sub>1-90</sub>WT and YPet-only; (b) mCHERRY-M45<sub>1-90</sub>AAAA and YPet-only; (c) mCHERRY-M45<sub>1-90</sub>WT  
489 and YPet-RIPK1<sub>497-583</sub>; (d) mCHERRY-M45<sub>1-90</sub>WT and YPet-RIPK3<sub>387-518</sub>; (e) mCHERRY-M45<sub>1-</sub>  
490 90AAAA and YPet-RIPK1<sub>497-583</sub> and (f) mCHERRY-M45<sub>1-90</sub>AAAA and YPet-RIPK3<sub>387-518</sub>. (g) Number  
491 of bins where intensity (photons/ms) exceeded 5000 or 10000 in the last 200 s of a 10-min  
492 incubation, where samples contained no His-Ub-M45<sub>1-90</sub> or up to a 4-fold molar excess of His-Ub-  
493 M45<sub>1-90</sub>. Coincidence experiments conducted three times or more on different days. Quantification  
494 performed once.  
495

496 **Figure 5. Co-assembly of M45<sub>1-90</sub>WT with RIPK1<sub>497-583</sub> and His-Ub-RIPK3<sub>387-518</sub> results in the**  
497 **formation of heteromeric fibrils and dense fibrillar networks.** (a) Representative electron  
498 micrographs of fibrils formed by M45<sub>1-90</sub>, RIPK1<sub>497-583</sub> or His-Ub-RIPK3<sub>387-518</sub> when dialysed  
499 individually or in mixtures, into phosphate buffer to remove urea. Confocal fluorescence images of  
500 heteromeric fibrils formed by co-assembly of (b) mCHERRY-M45<sub>1-90</sub> and YPet-RIPK1<sub>497-583</sub>; (c)  
501 mCHERRY-M45<sub>1-90</sub> and YPet-RIPK3<sub>387-518</sub>; (d) mCHERRY-RIPK1<sub>497-583</sub> and YPet-RIPK3<sub>387-518</sub>;  
502 (e) ECFP-M45<sub>1-90</sub> with mCHERRY- RIPK1<sub>497-583</sub> and YPet-RIPK3<sub>387-518</sub>. (f) STED super-resolution  
503 and (g) electron microscope images of heteromeric fibrils formed by co-assembly of mCHERRY-  
504 M45<sub>1-90</sub> and YPet-RIPK3<sub>387-518</sub>.

505

506 **Figure 6. SDS AGE analysis of RHIM-based assemblies and model of the heteromeric**  
507 **M45:RIPK3 core.** (a) SDS AGE analysis of YPet-RIPK3<sub>387-518</sub> and mCHERRY-M45<sub>1-90</sub>WT or  
508 mCHERRY-M45<sub>1-90</sub>AAAA homomeric and heteromeric assemblies, formed by initial mixing in 8 M  
509 urea, followed by removal of urea by overnight dialysis. Dialysed samples were incubated with 0 or  
510 2% SDS at RT for 10 min before electrophoresis. Monomeric forms of the protein constructs were  
511 maintained in 8 M urea prior to electrophoresis, as indicated. Protein components as indicated  
512 above each lane. (b) SDS AGE analysis of homomeric and heteromeric assemblies of YPet-  
513 RIPK1<sub>497-583</sub>, YPet-RIPK3<sub>387-518</sub> and mCHERRY-M45<sub>1-277</sub>WT or mCHERRY-M45<sub>1-277</sub>AAAA. BSA  
514 was included in M45-only samples to maintain the overall protein concentration constant. (c)  
515 Structure of the RIPK1:RIPK3 RHIM core. Figure prepared using PyMol Graphics System from  
516 PDB 5V7Z. The RIPK3 sequence is coloured in blue and RIPK1 is coloured in green. Tetrad  
517 residue side chains are shown as sticks; Tyr, Asn/Gln, Ser and Cys side chains are shown in wheat,  
518 red, grey and yellow, respectively. Core tetrad interactions across the opposing sheets are indicated  
519 by the dotted box. (d) Model of M45:RIPK3 RHIM core, prepared by appropriate mutation of  
520 RIPK1. The M45 sequence is coloured in cyan and RIPK3 in blue. Tetrad residue side chains are  
521 shown as sticks; Tyr, Asn/Gln, Val and Cys side chains are shown in wheat, red, grey and yellow,  
522 respectively. Core tetrad interactions across the opposing sheets are indicated by the dotted box. (e)  
523 Confocal microscopy image of a single fibril composed of YPet-M45. (f) Schematic representation  
524 showing associated globular domains (e.g. kinase or RNR, coloured green) flanking either side of  
525 the amyloid core formed by RHIMs (coloured grey).  
526

527 **Legends to Supplementary Figures**

528

529 **Supplementary Fig 1. The AAAA substitution of the core tetrad within the RHIM of M45<sub>1-90</sub>**  
530 **abolishes its ability to self-assemble into fibrils.** Negatively stained EM of fibrils formed by (a)  
531 M45<sub>1-90</sub>WT-mCHERRY and (b) M45<sub>1-90</sub>AAAA-mCHERRY fibrils upon removal of 8 M urea by  
532 dialysis.

533

534 **Supplementary Fig 2. An increase in the amount of M45<sub>1-90</sub> relative to RIPK3<sub>387-518</sub> results in**  
535 **the formation of increasingly large fibrillar assemblies.** Negatively stained EMs of fibrillar  
536 assemblies formed from mixtures of M45<sub>1-90</sub>WT-mCHERRY and YPetRIPK3<sub>387-518</sub> at (a) 1:1, (b) 2:1  
537 and (c) 4:1 relative molar concentration. Monomeric forms of the proteins were mixed together and  
538 allowed to co-assemble upon removal of 8 M urea by dialysis.

539

540 **Supplementary Fig 3. The presence of an unrelated His<sub>6</sub>-ubiquitin fusion protein does not**  
541 **result in generation of fibrillar networks.** Samples of either (a) His-Ub-M45<sub>1-90</sub> or (b) His-Ub-  
542 RIPK1<sub>497-583</sub> RHIM fusion proteins were mixed with the non-RHIM-containing protein His-Ub-  
543 RodA in urea-containing buffer and allowed to assemble upon removal of urea by dialysis.

544

545

546 **Supplementary Fig 4. Heteromeric assemblies formed by RHIM-containing fragments are**  
547 **thioflavin T-positive, indicative of an amyloid structure.** mCHERRY-M45<sub>1-90</sub> and YPet-  
548 RIPK3<sub>387-518</sub> were allowed to coassemble during dialysis, following which thioflavin T was added  
549 and the dialysate imaged using a Cytation 3 Imager (BioTek). CFP, YFP and Texas Red filter sets  
550 were used to detect Thioflavin T fluorescence, YPet and mCHERRY respectively.

551

552

553 **Supplementary Fig 5. SDS-PAGE analysis of RHIM-containing assemblies resulting from**  
554 **overnight dialysis of individual constructs (a–c) or protein pairs (d–f).** RHIM-containing fusion  
555 proteins dialysed overnight to allow fibril assembly, either individually or in pairs after initial  
556 mixing in urea in the monomeric form. All RHIM constructs carried mCHERRY as fusion protein  
557 partner. RHIM-containing individual construct or pairs as indicated in each panel. The stability of  
558 the resulting material towards SDS treatment was tested. Samples are total dialysate (total),  
559 supernatant from centrifugation at 16000g for 10 min (soluble), pellet from centrifugation  
560 resuspended in 20 mM NaH<sub>2</sub>PO<sub>4</sub>, 150 mM NaCl, 0.5 mM DTT, pH 7.4 (insoluble), pellet from  
561 centrifugation treated with 2% SDS for 10 min at 37 °C and then separated again into supernatant  
562 (SDS-soluble) and pellet (SDS-insoluble). SDS-insoluble material was incubated in 8 M urea to  
563 solubilise material for detection by PAGE. This SDS analysis was performed once.

## 564 **Methods**

### 565 **Expression of RHIM fusion proteins**

566 RHIM-containing portions of mCMV M45 (Q06A28; residues 1-90), human RIPK1 (Q13546;  
567 residues 497-583), human RIPK3 (Q9Y572; residues 387-518), were produced as maltose binding  
568 protein (MBP) fusion proteins using the pMAL vector, as His<sub>6</sub>-Ubiquitin fusion proteins using the  
569 pHUE vector system (Catanzariti et al) or as His-tagged N- or C-terminal ECFP, YPet or  
570 mCHERRY fusion proteins using a vector prepared in-house. Successful cloning was confirmed by  
571 sequencing at the Australian Genome Research Facility at the Westmead Millennium Institute.  
572 Proteins were expressed in BL21(DE3) *E. coli* grown in LB media containing ampicillin at 37 °C  
573 for 2–3 hours, with induction by 0.5–1.0 mM IPTG when the OD<sub>600 nm</sub> of the culture reached  
574 0.6–0.8. All pMAL plasmids were grown in LB media containing 0.2% glucose to prevent amylase  
575 production. SDS PAGE analysis of cell lysates following induction of protein over-expression  
576 indicated that the MBP-RHIM fusion proteins were present in the soluble cell fraction while the  
577 His<sub>6</sub>-Ub-RHIM fusion proteins and His<sub>6</sub>-ECFP, His<sub>6</sub>-YPet or His<sub>6</sub>-mCHERRY fusion proteins were  
578 located in the insoluble fraction.

### 579 **Purification of MBP fusion proteins**

580 Cells were lysed by incubation in 20 mM Tris.HCl, 200 mM NaCl, 1 mM EDTA and 0.5 mM DTT,  
581 pH 8.0 with lysozyme at 100 µg/mL, followed by a freeze thaw cycle. DNaseI and MgSO<sub>4</sub> were  
582 added to final concentrations of 100 µg/mL and 100 mM respectively, and samples were incubated  
583 with stirring for 15 min at room temperature. Following the addition of AEBSF to 0.2 mM, samples  
584 were centrifuged at 4 °C at 10,000g for 40 min, to separate soluble material from insoluble cell  
585 debris. MBP fusion proteins were purified from the soluble fraction using amylose beads from New  
586 England Biolabs (MA, USA), as per the manufacturer's instructions.

### 587 **Purification of His<sub>6</sub>-Ubiquitin fusion proteins**

588 Cell pellets were lysed by suspension and incubation in 6 M GuHCl, 100 mM NaH<sub>2</sub>PO<sub>4</sub>, 20 mM  
589 Tris.HCl, 5 mM β-mercaptoethanol, pH 8.0, and soluble material further purified on Ni-NTA

590 agarose (Life Technologies) under denaturing conditions, with exchange into 8 M urea, 100 mM  
591 NaH<sub>2</sub>PO<sub>4</sub>, 20 mM Tris.HCl, 5 mM β-mercaptoethanol at pH 6.0 for washing and pH 4.0 for elution  
592 from the Ni-NTA agarose.

### 593 **Purification of His<sub>6</sub>-ECFP, His<sub>6</sub>-YPet and His<sub>6</sub>-mCHERRY fusion proteins**

594 Two methods for purification of polyhistidine-tagged fluorescent protein-RHIM fragment fusions  
595 were used during the course of this study. The first method was batch purification where cell  
596 pellets were lysed by suspension and incubation in 8 M urea, 100 mM NaH<sub>2</sub>PO<sub>4</sub>, 20 mM Tris.HCl,  
597 5 mM β-mercaptoethanol, pH 8.0. Soluble material was purified using Ni-NTA agarose beads (Life  
598 Technologies) under denaturing conditions, with 8 M urea, 100 mM NaH<sub>2</sub>PO<sub>4</sub>, 20 mM Tris.HCl,  
599 5 mM β-mercaptoethanol at pH 8.0 and in the presence of 20mM imidazole for washing steps and  
600 300mM imidazole for elution from the Ni-NTA agarose. The second method involved using a His-  
601 trap (GE Healthcare) column. For this, cell pellets were lysed as described for the purification of  
602 MBP fusion proteins. The insoluble pellet was resuspended in 8 M urea, 100 mM NaH<sub>2</sub>PO<sub>4</sub>,  
603 20 mM Tris, pH 8.0 and allow to dissolve by stirring for 2 h. The sample was centrifuged at 4 °C at  
604 31,000g for 45 min, filtered and then purified on a 5mL His-Trap column (GE Healthcare) under  
605 denaturing conditions (8 M urea, 100 mM NaH<sub>2</sub>PO<sub>4</sub>, 20 mM Tris, pH 8.0 + 0.5mM DTT) using  
606 AKTA FPLC. The elution of protein was achieved with a gradient of imidazole. Protein elution was  
607 monitored by absorbance at 280 nm.

608 For both purification procedures, the eluted fractions were analysed by SDS-PAGE. Fractions  
609 containing the fusion proteins were pooled and concentrated using Amicon Ultra-15 Centrifugal  
610 Filter Units with MWCO 30kDa (Millipore). The concentration of the final concentrated protein  
611 sample was determined by BCA assay (Pierce).

### 612 **Removal of fusion tag (MBP and His<sub>6</sub>-Ubiquitin)**

613 MBP-RHIM fusion proteins at concentrations of 1–4 mg/mL in 20 mM Tris.HCl, 200 mM NaCl,  
614 1 mM EDTA, 2.5 mM CaCl<sub>2</sub>, 10 mM maltose pH 8.0 were incubated with 5 U Thrombin for 2  
615 hours at 37 °C. Samples were centrifuged at 16 000g for 10 min to separate insoluble and soluble



616 material and both fractions were analysed by SDS PAGE. His<sub>6</sub>-Ub-RHIM constructs in 8 M urea-  
617 containing buffer were dialysed overnight at room temperature, against 20 mM NaH<sub>2</sub>PO<sub>4</sub>, 50 mM  
618 NaCl pH 7.4 and then incubated with deubiquitylating enzyme UBP41 (produced in-house  
619 according to Catanzariti et al) at 37°C for 3 hours. The RHIM-containing fragments self-assembled  
620 to form insoluble material during dialysis and incubation with UBP41. Samples were centrifuged to  
621 separate the supernatant, containing the cleaved His<sub>6</sub>-Ubiquitin, from the pellet. The pellet  
622 containing the RHIM fragment was washed twice with 20 mM NaH<sub>2</sub>PO<sub>4</sub>, 50 mM NaCl pH 7.4,  
623 followed by addition of 6 M GuHCl, 100 mM NaH<sub>2</sub>PO<sub>4</sub>, 20 mM Tris.HCl pH 8.0 to solubilise the  
624 pellet and maintain the RHIM fragments in a monomeric form for storage.

### 625 **Size exclusion chromatography**

626 MBP-RHIM fusion proteins, before and after treatment with enzyme to remove the fusion partner,  
627 were analysed by size exclusion chromatography using a Superdex 75 10/30 GL column (GE  
628 Healthcare Life Sciences), running in 20 mM NaH<sub>2</sub>PO<sub>4</sub>, 150 mM NaCl pH 7.4 with a flow rate of  
629 0.4 mL/min. Protein elution was monitored by absorbance at 280 nm and peaks were analysed by  
630 SDS-PAGE and negative stain transmission electron microscopy.

### 631 **Congo red assays**

632 Insulin (1 mg/mL) was incubated in 20 mM glycine pH 2.0, with shaking at 700 rpm for 4 hours at  
633 60 °C to convert it into amyloid fibril form. Samples of monomeric insulin, insulin fibrils or MBP-  
634 RHIM fusion proteins, at a concentration of 100 µM, were prepared with 2 µM Congo red in  
635 20 mM NaH<sub>2</sub>PO<sub>4</sub>, 150 mM NaCl pH 7.4 in a 1 mL cuvette. The absorbance of each protein-  
636 containing solution was measured over the wavelength range 400 to 650 nm and compared to the  
637 absorbance profile of a solution containing only Congo red in buffer.

### 638 **M45 RHIM peptide**

639 A synthetic peptide encompassing the RHIM of M45 was purchased from Genscript with the  
640 sequence VRIMNGVSGIQIGNHNAMS. The peptide was solubilised in DMSO and then diluted  
641 with water to a final peptide concentration of 300 µM with addition of a trace amount of ammonium

642 hydroxide to aid solubilisation. Addition of Thioflavin T indicated the development of a ThT-  
643 positive structure. Samples were analysed by transmission electron microscopy.

#### 644 **Transmission Electron Microscopy (TEM)**

645 A droplet of protein or peptide-containing solution (20  $\mu$ L) was placed onto Parafilm™ and a  
646 carbon/formvar-coated copper grid (200 mesh, ProSciTech) was floated on the droplet surface for 1  
647 minute. Excess solution was removed by touching the edge of the grid to filter paper and the grid  
648 was washed with filtered water three times and then stained by floating on a 20- $\mu$ L droplet of 2%  
649 uranyl acetate for 2 minutes, followed by removal of excess solution by blotting. The grid was air-  
650 dried overnight at room temperature and then imaged using a Philips CM12 microscope operating at  
651 120 kV. Digital images were recorded using a Morada 11 MegaPixel CCD camera camera and  
652 iTEM digital imaging system.

#### 653 **ThT Kinetic Assays**

654 His-Ub or fluorescent RHIM-containing fusion proteins in 8 M urea-containing buffer were diluted  
655 into phosphate buffer (25 mM  $\text{NaH}_2\text{PO}_4$ , 150 mM NaCl, 0.5 mM DTT, pH 7.4) containing 40  $\mu$ M  
656 Thioflavin T to a final volume of 200  $\mu$ L, protein concentration 10  $\mu$ M His-Ub-M45, 2.5  $\mu$ M  
657 mCHERRY-RIPK3<sub>387-518</sub> or 2.5  $\mu$ M YPet-RIPK1<sub>497-583</sub> and residual urea concentration of 0.2 M.  
658 Three replicates of each protein sample were analysed simultaneously in a 96-well black  
659 fluorescence plate sealed with optically clear film (Corning®). Samples were incubated at 25 °C  
660 and fluorescence was measured at 480 nm, with excitation at 440 nm, every 60 s in a POLARstar  
661 Omega microplate reader (BMG Labtech).

#### 662 **Fibril co-assembly for TEM**

663 His<sub>6</sub>-Ub-RIPK3<sub>387-518</sub> and RIPK1<sub>497-583</sub> and M45<sub>1-90</sub> were mixed together in 1:1 molar ratios or with  
664 an appropriate volume of urea-containing buffer and then dialysed against 25 mM  $\text{NaH}_2\text{PO}_4$ ,  
665 150 mM NaCl, 0.5 mM DTT pH 7.4 for a minimum of 4 hours. Samples were removed and used to  
666 prepare negatively stained grids for TEM, as above.

667

## 668 **Fluorescence anisotropy assays**

669 Covalent labelling of RIPK1<sub>497-583</sub> with the Alexa 488 fluorescence tag was performed in the  
670 amyloid state. Samples of 1–4 mL of 100  $\mu$ M RHIM fragment in 6 M GuHCl, obtained from the  
671 cleavage of His<sub>6</sub>-Ub-RIPK1<sub>497-583</sub>, were dialysed against phosphate buffer at pH 8.0 with 0.5 mM  
672 DTT at room temperature for 3h, followed by further dialysis against 20 mM NaH<sub>2</sub>PO<sub>4</sub>, 150 mM  
673 NaCl pH 7.4 at pH 8.0 with two buffer changes. After the dialysis process, RIPK1-RHIM protein  
674 was in an amyloid state and the sample was centrifuged at 16 000g for 10 min. The supernatant was  
675 discarded and the amyloid pellet was resuspended in 1mL of 20 mM NaH<sub>2</sub>PO<sub>4</sub>, 150 mM NaCl, pH  
676 8.0. A 50– $\mu$ L volume of 10 mg/mL Alexa 488 (10 mg/mL in DMSO) was added to the amyloid  
677 sample. The sample was incubated on a rocker for 1 h at room temperature and then unbound dye  
678 was removed by centrifugation at 16000g for 10 min. The pellet was washed 3 times with 1 mL of  
679 20 mM NaH<sub>2</sub>PO<sub>4</sub>, 150 mM NaCl, pH 8.0 and then resuspended in 1 mL of 8 M urea, 20 mM  
680 NaH<sub>2</sub>PO<sub>4</sub>, 150 mM NaCl, pH 7.4 for storage. The degree of labelling was calculated to be 5%.  
681 For polarization experiments, samples containing a molar ratio of 1:1999 of Alexa 488-RIPK1<sub>497-583</sub>  
682 to unlabelled RIPK1<sub>497-583</sub>, RIPK3<sub>387-518</sub> or M45<sub>1-90</sub> in 20 mM NaH<sub>2</sub>PO<sub>4</sub>, 150 mM NaCl, pH 7.4  
683 were prepared to a final volume of 300  $\mu$ L. Total final protein concentrations of unlabelled protein  
684 were 0.85  $\mu$ M for RIPK1, 0.69  $\mu$ M RIPK3 and 1.05  $\mu$ M for M45 and the residual urea  
685 concentration was 0.052 M. Three replicates of each protein sample were analysed simultaneously  
686 in a 96-well black fluorescence plate sealed with optically clear film (Corning®). Samples were  
687 incubated at 25 °C in a POLARstar Omega microplate reader (BMG Labtech) and excited at  
688 480 nm. The parallel and perpendicular fluorescence emission was recorded at 520 nm, every 60 s.  
689 These fluorescence intensities were used to calculate the fluorescence polarization.

## 690 **X-ray fibre diffraction**

691 His<sub>6</sub>-Ub-M45<sub>1-90</sub> protein was allowed to assemble into fibrils by dialysis out of 8 M urea-containing  
692 buffer into water overnight. The insoluble fibrils were pelleted by centrifugation at 16000g for  
693 10 min, resuspended in a small volume of water and allowed to air-dry from a droplet suspended

694 between the wax-filled ends of two glass capillaries. X-ray fibre diffraction images were obtained  
695 using an in-house Cu K $\alpha$  Rigaku rotating anode source (wavelength 1.5418 Å) and MARresearch  
696 image plate detector.

#### 697 **SDS-stability assays**

698 Protein samples (0.5–1 mL) of individual fluorescent RHIM-containing constructs as well as  
699 mixtures of these proteins were diluted to final individual protein concentrations of 20  $\mu$ M with 8 M  
700 urea, 25 mM NaH<sub>2</sub>PO<sub>4</sub>, 150 mM NaCl, pH 7.4. Approximately 50  $\mu$ L of each sample was removed  
701 for analysis as the monomeric, non-assembled control. The remaining solutions were dialysed  
702 overnight at room temperature against 25 mM NaH<sub>2</sub>PO<sub>4</sub>, 150 mM NaCl, 0.5 mM DTT, pH 7.4.  
703 Samples were removed and prepared with 4% glycerol and 0.0008% bromophenol blue and 0 or 2%  
704 SDS, incubated at room temperature for 10 min and then analysed by electrophoresis using a 1%  
705 agarose gel running in TAE buffer containing 0.1% SDS. Gels were imaged on a Bio-Rad Chemi-  
706 Doc imaging system with 605/50nm and 695/55nm emission filters. In order to study the stability of  
707 the amyloid fibrils by SDS-PAGE, mCHERRY RHIM-containing constructs, individually or in  
708 mixtures, were dialysed against phosphate buffer overnight, at room temperature. After dialysis,  
709 two 50- $\mu$ L samples were centrifuged at 16,000g for 10 min and the resulting supernatants removed  
710 and pooled (soluble sample). One pellet was resuspended with 50  $\mu$ L of 8 M urea, 25 mM  
711 NaH<sub>2</sub>PO<sub>4</sub>, 150 mM NaCl, pH 7.4 to allow visualisation of the insoluble material produced during  
712 dialysis (insoluble sample). The other pellet was resuspended in 50  $\mu$ L of 2% SDS in 25 mM  
713 NaH<sub>2</sub>PO<sub>4</sub>, 150 mM NaCl, pH 7.4 and incubated at 37 °C for 10 minutes. SDS-containing samples  
714 were then centrifuged at 16,000g for 10 min. The supernatant was removed (SDS-soluble sample)  
715 and the pellet (SDS-insoluble sample) resuspended in 50  $\mu$ L urea-containing buffer. All samples  
716 were boiled with NuPAGE LDS sample buffer and NuPAGE reducing agent (50 mM DTT, Thermo  
717 Scientific) and then analysed by SDS PAGE.

#### 718 **Confocal microscopy**

719 Protein samples (0.5 mL) in 8 M urea containing mixtures of monomeric, purified YPET, ECFP  
720 and mCHERRY RHIM-containing constructs at final individual protein concentrations of either 2.5  
721 or 5  $\mu$ M were dialysed overnight at room temperature against 25 mM NaH<sub>2</sub>PO<sub>4</sub>, 150 mM NaCl,  
722 0.5 mM DTT, pH 7.4. Samples (15  $\mu$ L) were placed on glass slides, protected with cover slips and  
723 imaged on a Zeiss LSM 510 Meta confocal microscope.

#### 724 **Single molecule fluorescence spectroscopy**

725 Mixtures of fluorescent fusion proteins with YPet or mCHERRY fluorophores were prepared at  
726 70  $\mu$ M in 8 M urea, 25 mM NaH<sub>2</sub>PO<sub>4</sub>, 150 mM NaCl, 0.5 mM DTT, pH 7.4 and then diluted 100-  
727 fold with 25 mM NaH<sub>2</sub>PO<sub>4</sub>, 150 mM NaCl, 0.5 mM DTT, pH 7.4 in a 192-well silicone plate for  
728 single molecule measurement before monitoring. Plates were analyzed at room temperature on a  
729 Zeiss Axio Observer microscope with a custom-built data acquisition setup. Fluorescence signal  
730 was collected and separated using a 565  $\square$  nm dichroic mirror. For detection of YPET-tagged  
731 proteins, signal was passed through a 525/20  $\square$  nm band pass filter; for detection of mCHERRY-  
732 tagged proteins a 580  $\square$  nm long pass filter was used. For experiments with all three RHIM-  
733 containing proteins, protein mixtures containing YPet-RIPK<sub>387-518</sub>, mCHERRY-RIPK<sub>1497-583</sub> and  
734 His<sub>6</sub>-Ub-M45<sub>1-90</sub> were prepared in 8 M urea-containing buffer, to provide samples containing the  
735 RIPK3:RIPK1:M45 RHIMs in the range ~4:4:1 to ~1:1:4. Samples were diluted 100-fold into  
736 25 mM NaH<sub>2</sub>PO<sub>4</sub>, 150 mM NaCl, 0.5 mM DTT, pH 7.4 and 20  $\mu$ L pipetted into a 192-well silicone  
737 plate for single molecule measurement. For experiments with multiple fluorophores, the signal from  
738 the two channels was recorded simultaneously in 1  $\square$  ms time bins.

#### 739 **Generation of M45-expressing HT-29 cells and cell death assays**

740 M45<sub>1-90</sub> and M45<sub>1-277</sub> fragments were amplified from MCMV (Smith) and cloned upstream of the  
741 E.Coli DNA gyrase subunit B (residues 2-220) in the pCDH-MCS-EF1-neo lentivector. All  
742 insertions were validated by sequencing (Garvan Institute, Sydney, Australia). Lentivirus for M45<sub>1-90</sub>-  
743 gyrase, M45<sub>1-277</sub>-gyrase or empty vector control were made in 293T cells by co-transfecting the  
744 lentivectors with psPAX2 and pMD2G using Fugene HD (Promega). HT-29s were then transduced

745 with the lentivirus particles in the presence of polybrene (Santa Cruz), and after 3 days G418  
746 (Roche) was added for the subsequent 10 days to select for successfully transduced cells. M45<sub>1-90</sub>-  
747 gyrase, M45<sub>1-277</sub>-gyrase or empty-vector-control transduced HT-29s were seeded in 96 well plates  
748 ( $10^4$  cells/well) and allowed to adhere for 6 h before treating with 900 nM coumermycin A1 (Enzo)  
749 or media (no treatment control), followed 1 hour later with combinations of TNF (30 ng/ml, R and  
750 D), BV-6 (1  $\mu$ M, Selleckchem) and z-VAD-fmk (25  $\mu$ M, R and D), or DMSO only (Sigma-  
751 Aldrich) as control. Cell viability was then assessed 17-18 hour post-treatment by measuring levels  
752 of intracellular ATP, using the CellTitre-Glo2 Assay (Promega). Data was expressed as percentage  
753 of cell survival relative to the DMSO only control. Luminescence was measured using an Infinite  
754 M1000 Pro plate reader (TECAN).

755

756

## 757 **References**

758

- 759 1. Sun, X., Yin, J., Starovasnik, M.A., Fairbrother, W.J. & Dixit, V.M. Identification of a novel homotypic  
760 interaction motif required for the phosphorylation of receptor-interacting protein (RIP) by RIP3. *J*  
761 *Biol Chem* **277**, 9505-11 (2002).
- 762 2. Newton, K. RIPK1 and RIPK3: critical regulators of inflammation and cell death. *Trends Cell Biol* **25**,  
763 347-53 (2015).
- 764 3. Sun, L. & Wang, X. A new kind of cell suicide: mechanisms and functions of programmed necrosis.  
765 *Trends Biochem Sci* **39**, 587-93 (2014).
- 766 4. Vandenabeele, P., Galluzzi, L., Vanden Berghe, T. & Kroemer, G. Molecular mechanisms of  
767 necroptosis: an ordered cellular explosion. *Nat Rev Mol Cell Biol* **11**, 700-14 (2010).
- 768 5. Kaiser, W.J., Sridharan, H., Huang, C., Mandal, P., Upton, J.W., Gough, P.J., Sehon, C.A., Marquis,  
769 R.W., Bertin, J. & Mocarski, E.S. Toll-like receptor 3-mediated necrosis via TRIF, RIP3, and MLKL. *J*  
770 *Biol Chem* **288**, 31268-79 (2013).
- 771 6. Kaiser, W.J., Upton, J.W. & Mocarski, E.S. Viral modulation of programmed necrosis. *Curr Opin Virol*  
772 **3**, 296-306 (2013).
- 773 7. Rebsamen, M., Heinz, L.X., Meylan, E., Michallet, M.C., Schroder, K., Hofmann, K., Vazquez, J.,  
774 Benedict, C.A. & Tschopp, J. DAI/ZBP1 recruits RIP1 and RIP3 through RIP homotypic interaction  
775 motifs to activate NF-kappaB. *EMBO Rep* **10**, 916-22 (2009).
- 776 8. Thapa, R.J., Ingram, J.P., Ragan, K.B., Nogusa, S., Boyd, D.F., Benitez, A.A., Sridharan, H., Kosoff, R.,  
777 Shubina, M., Landsteiner, V.J., Andrade, M., Vogel, P., Sigal, L.J., tenOever, B.R., Thomas, P.G.,  
778 Upton, J.W. & Balachandran, S. DAI Senses Influenza A Virus Genomic RNA and Activates RIPK3-  
779 Dependent Cell Death. *Cell Host Microbe* **20**, 674-681 (2016).
- 780 9. Cook, W.D., Moujalled, D.M., Ralph, T.J., Lock, P., Young, S.N., Murphy, J.M. & Vaux, D.L. RIPK1- and  
781 RIPK3-induced cell death mode is determined by target availability. *Cell Death Differ* **21**, 1600-12  
782 (2014).
- 783 10. Murphy, J.M., Czabotar, P.E., Hildebrand, J.M., Lucet, I.S., Zhang, J.G., Alvarez-Diaz, S., Lewis, R.,  
784 Lalaoui, N., Metcalf, D., Webb, A.I., Young, S.N., Varghese, L.N., Tannahill, G.M., Hatchell, E.C.,  
785 Majewski, I.J., Okamoto, T., Dobson, R.C., Hilton, D.J., Babon, J.J., Nicola, N.A., Strasser, A., Silke, J.  
786 & Alexander, W.S. The pseudokinase MLKL mediates necroptosis via a molecular switch  
787 mechanism. *Immunity* **39**, 443-53 (2013).
- 788 11. Murphy, J.M. & Silke, J. Ars Moriendi; the art of dying well - new insights into the molecular  
789 pathways of necroptotic cell death. *EMBO Rep* **15**, 155-64 (2014).
- 790 12. Orozco, S., Yatim, N., Werner, M.R., Tran, H., Gunja, S.Y., Tait, S.W., Albert, M.L., Green, D.R. &  
791 Oberst, A. RIPK1 both positively and negatively regulates RIPK3 oligomerization and necroptosis.  
792 *Cell Death Differ* **21**, 1511-21 (2014).
- 793 13. Linkermann, A. & Green, D.R. Necroptosis. *N Engl J Med* **370**, 455-65 (2014).
- 794 14. Oberst, A. Death in the fast lane: what's next for necroptosis? *FEBS J Epub ahead of print.*,  
795 2015/09/24 (2015).
- 796 15. Caccamo, A., Branca, C., Piras, I.S., Ferreira, E., Huentelman, M.J., Liang, W.S., Readhead, B., Dudley,  
797 J.T., Spangenberg, E.E., Green, K.N., Belfiore, R., Winslow, W. & Oddo, S. Necroptosis activation in  
798 Alzheimer's disease. *Nat Neurosci* **20**, 1236-1246 (2017).
- 799 16. Degtarev, A. & Linkermann, A. Generation of small molecules to interfere with regulated necrosis.  
800 *Cellular and Molecular Life Sciences* **73**, 2251-2267 (2016).
- 801 17. Seifert, L., Werba, G., Tiwari, S., Giao Ly, N.N., Allothman, S., Alqunaibit, D., Avanzi, A., Barilla, R.,  
802 Daley, D., Greco, S.H., Torres-Hernandez, A., Pergamo, M., Ochi, A., Zambirinis, C.P., Pansari, M.,  
803 Rendon, M., Tippens, D., Hundeyin, M., Mani, V.R., Hajdu, C., Engle, D. & Miller, G. The Necrosome  
804 Promotes Pancreas Oncogenesis via CXCL1 and Mincle Induced Immune Suppression. *Nature* **532**,  
805 245-249 (2016).
- 806 18. Mocarski, E.S., Guo, H. & Kaiser, W.J. Necroptosis: The Trojan horse in cell autonomous antiviral  
807 host defense. *Virology* **479-480**, 160-6 (2015).

- 808 19. Baker, M., Shanmugam, N., Pham, C.L.L., Strange, M., Steain, M. & Sunde, M. RHIM-based  
809 protein:protein interactions in anti-microbial defence against programmed cell death by  
810 necroptosis. *Semin Cell Dev Biol* (2018).
- 811 20. Fliss, P.M. & Brune, W. Prevention of cellular suicide by cytomegaloviruses. *Viruses* **4**, 1928-49  
812 (2012).
- 813 21. Daley-Bauer, L.P., Roback, L., Crosby, L.N., McCormick, A.L., Feng, Y., Kaiser, W.J. & Mocarski, E.S.  
814 Mouse cytomegalovirus M36 and M45 death suppressors cooperate to prevent inflammation  
815 resulting from antiviral programmed cell death pathways. *Proc Natl Acad Sci U S A* **114**, E2786-  
816 e2795 (2017).
- 817 22. Mocarski, E.S., Kaiser, W.J., Livingston-Rosanoff, D., Upton, J.W. & Daley-Bauer, L.P. True grit:  
818 programmed necrosis in antiviral host defense, inflammation, and immunogenicity. *J Immunol* **192**,  
819 2019-26 (2014).
- 820 23. Upton, J.W., Kaiser, W.J. & Mocarski, E.S. Cytomegalovirus M45 cell death suppression requires  
821 receptor-interacting protein (RIP) homotypic interaction motif (RHIM)-dependent interaction with  
822 RIP1. *J Biol Chem* **283**, 16966-70 (2008).
- 823 24. Brune, W., Menard, C., Heesemann, J. & Koszinowski, U.H. A ribonucleotide reductase homolog of  
824 cytomegalovirus and endothelial cell tropism. *Science* **291**, 303-5 (2001).
- 825 25. Guo, H., Omoto, S., Harris, P.A., Finger, J.N., Bertin, J., Gough, P.J., Kaiser, W.J. & Mocarski, E.S.  
826 Herpes simplex virus suppresses necroptosis in human cells. *Cell Host Microbe* **17**, 243-51 (2015).
- 827 26. Upton, J.W., Kaiser, W.J. & Mocarski, E.S. Virus inhibition of RIP3-dependent necrosis. *Cell Host*  
828 *Microbe* **7**, 302-13 (2010).
- 829 27. Lembo, D., Donalisio, M., Hofer, A., Cornaglia, M., Brune, W., Koszinowski, U., Thelander, L. &  
830 Landolfo, S. The ribonucleotide reductase R1 homolog of murine cytomegalovirus is not a  
831 functional enzyme subunit but is required for pathogenesis. *J Virol* **78**, 4278-88 (2004).
- 832 28. Upton, J.W., Kaiser, W.J. & Mocarski, E.S. DAI/ZBP1/DLM-1 complexes with RIP3 to mediate virus-  
833 induced programmed necrosis that is targeted by murine cytomegalovirus vIRA. *Cell Host Microbe*  
834 **11**, 290-7 (2012).
- 835 29. Li, J., McQuade, T., Siemer, A.B., Napetschnig, J., Moriwaki, K., Hsiao, Y.S., Damko, E., Moquin, D.,  
836 Walz, T., McDermott, A., Chan, F.K. & Wu, H. The RIP1/RIP3 necrosome forms a functional amyloid  
837 signaling complex required for programmed necrosis. *Cell* **150**, 339-50 (2012).
- 838 30. Pham, C.L., Kwan, A.H. & Sunde, M. Functional amyloid: widespread in Nature, diverse in purpose.  
839 *Essays Biochem* **56**, 207-19 (2014).
- 840 31. Kleino, A., Ramia, N.F., Bozkurt, G., Shen, Y., Nailwal, H., Huang, J., Napetschnig, J., Gangloff, M.,  
841 Chan, F.K., Wu, H., Li, J. & Silverman, N. Peptidoglycan-Sensing Receptors Trigger the Formation of  
842 Functional Amyloids of the Adaptor Protein Imd to Initiate Drosophila NF-kappaB Signaling.  
843 *Immunity* **47**, 635-647 e6 (2017).
- 844 32. Mompean, M., Li, W., Li, J., Laage, S., Siemer, A.B., Bozkurt, G., Wu, H. & McDermott, A.E. The  
845 Structure of the Necrosome RIPK1-RIPK3 Core, a Human Hetero-Amyloid Signaling Complex. *Cell*  
846 (2018).
- 847 33. Macindoe, I., Kwan, A.H., Ren, Q., Morris, V.K., Yang, W., Mackay, J.P. & Sunde, M. Self-assembly of  
848 functional, amphipathic amyloid monolayers by the fungal hydrophobin EAS. *Proc Natl Acad Sci U S*  
849 *A* **109**, E804-11 (2012).
- 850 34. Sunde, M. & Blake, C. The structure of amyloid fibrils by electron microscopy and X-ray diffraction.  
851 *Advances in Protein Chemistry, Vol 50* **50**, 123-159 (1997).
- 852 35. LeVine, H., 3rd. Quantification of beta-sheet amyloid fibril structures with thioflavin T. *Methods*  
853 *Enzymol* **309**, 274-84 (1999).
- 854 36. Gambin, Y., Polinkovsky, M., Francois, B., Giles, N., Bhumkar, A. & Sierrecki, E. Confocal  
855 Spectroscopy to Study Dimerization, Oligomerization and Aggregation of Proteins: A Practical  
856 Guide. *Int J Mol Sci* **17**(2016).
- 857 37. Sierrecki, E., Giles, N., Bowden, Q., Polinkovsky, M.E., Steinbeck, J., Arriotti, N., Rahman, D., Bhumkar,  
858 A., Nicovich, P.R., Ross, I., Parton, R.G., Bocking, T. & Gambin, Y. Nanomolar oligomerization and  
859 selective co-aggregation of alpha-synuclein pathogenic mutants revealed by single-molecule  
860 fluorescence. *Sci Rep* **6**, 37630 (2016).



- 861 38. Hennig, S., Kong, G., Mannen, T., Sadowska, A., Kobelke, S., Blythe, A., Knott, G.J., Iyer, K.S., Ho, D.,  
862 Newcombe, E.A., Hosoki, K., Goshima, N., Kawaguchi, T., Hatters, D., Trinkle-Mulcahy, L., Hirose, T.,  
863 Bond, C.S. & Fox, A.H. Prion-like domains in RNA binding proteins are essential for building  
864 subnuclear paraspeckles. *J Cell Biol* **210**, 529-39 (2015).
- 865 39. Kato, M., Han, T.W., Xie, S., Shi, K., Du, X., Wu, L.C., Mirzaei, H., Goldsmith, E.J., Longgood, J., Pei, J.,  
866 Grishin, N.V., Frantz, D.E., Schneider, J.W., Chen, S., Li, L., Sawaya, M.R., Eisenberg, D., Tycko, R. &  
867 McKnight, S.L. Cell-free formation of RNA granules: low complexity sequence domains form  
868 dynamic fibers within hydrogels. *Cell* **149**, 753-67 (2012).
- 869 40. Wu, H. & Fuxreiter, M. The Structure and Dynamics of Higher-Order Assemblies: Amyloids,  
870 Signalosomes, and Granules. *Cell* **165**, 1055-66 (2016).
- 871 41. Wu, X.N., Yang, Z.H., Wang, X.K., Zhang, Y., Wan, H., Song, Y., Chen, X., Shao, J. & Han, J. Distinct  
872 roles of RIP1-RIP3 hetero- and RIP3-RIP3 homo-interaction in mediating necroptosis. *Cell Death*  
873 *Differ* **21**, 1709-20 (2014).
- 874 42. Murphy, J.M. & Vince, J.E. Post-translational control of RIPK3 and MLKL mediated necroptotic cell  
875 death. *F1000Res* **4**(2015).
- 876 43. Huang, Z., Wu, S.Q., Liang, Y., Zhou, X., Chen, W., Li, L., Wu, J., Zhuang, Q., Chen, C., Li, J., Zhong,  
877 C.Q., Xia, W., Zhou, R., Zheng, C. & Han, J. RIP1/RIP3 binding to HSV-1 ICP6 initiates necroptosis to  
878 restrict virus propagation in mice. *Cell Host Microbe* **17**, 229-42 (2015).
- 879 44. Guo, H., Kaiser, W.J. & Mocarski, E.S. Manipulation of apoptosis and necroptosis signaling by  
880 herpesviruses. *Med Microbiol Immunol* **204**, 439-48 (2015).
- 881 45. Pearson, J.S., Giogha, C., Muhlen, S., Nachbur, U., Pham, C.L., Zhang, Y., Hildebrand, J.M., Oates,  
882 C.V., Lung, T.W., Ingle, D., Dagley, L.F., Bankovacki, A., Petrie, E.J., Schroeder, G.N., Crepin, V.F.,  
883 Frankel, G., Masters, S.L., Vince, J., Murphy, J.M., Sunde, M., Webb, A.I., Silke, J. & Hartland, E.L.  
884 EspL is a bacterial cysteine protease effector that cleaves RHIM proteins to block necroptosis and  
885 inflammation. *Nat Microbiol* **2**, 16258 (2017).
- 886 46. Lin, J., Kumari, S., Kim, C., Van, T.M., Wachsmuth, L., Polykratis, A. & Pasparakis, M. RIPK1  
887 counteracts ZBP1-mediated necroptosis to inhibit inflammation. *Nature* **540**, 124-128 (2016).
- 888 47. Newton, K., Wickliffe, K.E., Maltzman, A., Dugger, D.L., Strasser, A., Pham, V.C., Lill, J.R., Roose-  
889 Girma, M., Warming, S., Solon, M., Ngu, H., Webster, J.D. & Dixit, V.M. RIPK1 inhibits ZBP1-driven  
890 necroptosis during development. *Nature* **540**, 129-133 (2016).
- 891 48. Sridharan, H., Ragan, K.B., Guo, H., Gilley, R.P., Landsteiner, V.J., Kaiser, W.J. & Upton, J.W. Murine  
892 cytomegalovirus IE3-dependent transcription is required for DAI/ZBP1-mediated necroptosis.  
893 *EMBO Rep* **18**, 1429-1441 (2017).
- 894 49. Zhou, W. & Yuan, J. Necroptosis in health and diseases. *Semin Cell Dev Biol* **35**, 14-23 (2014).

895

Figure 1.

a.

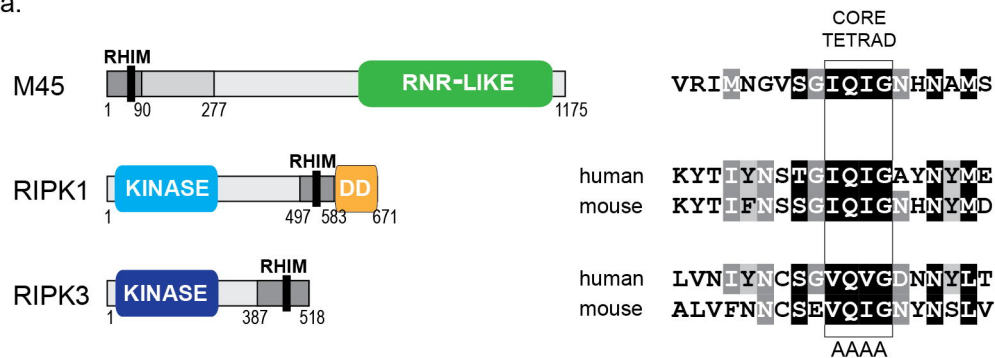

b.

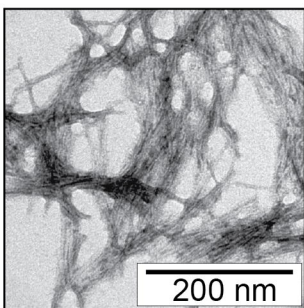

c.

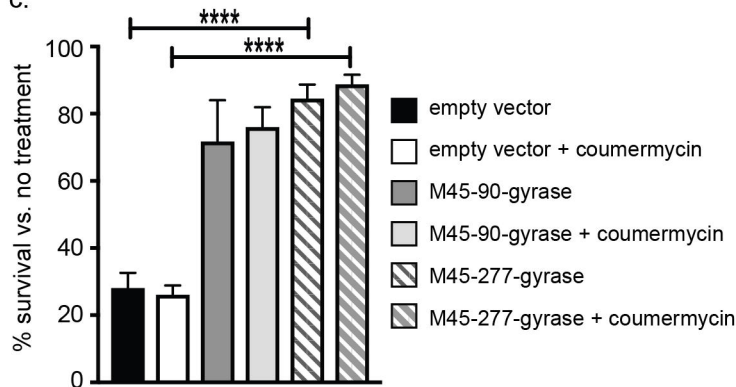

Figure 2.

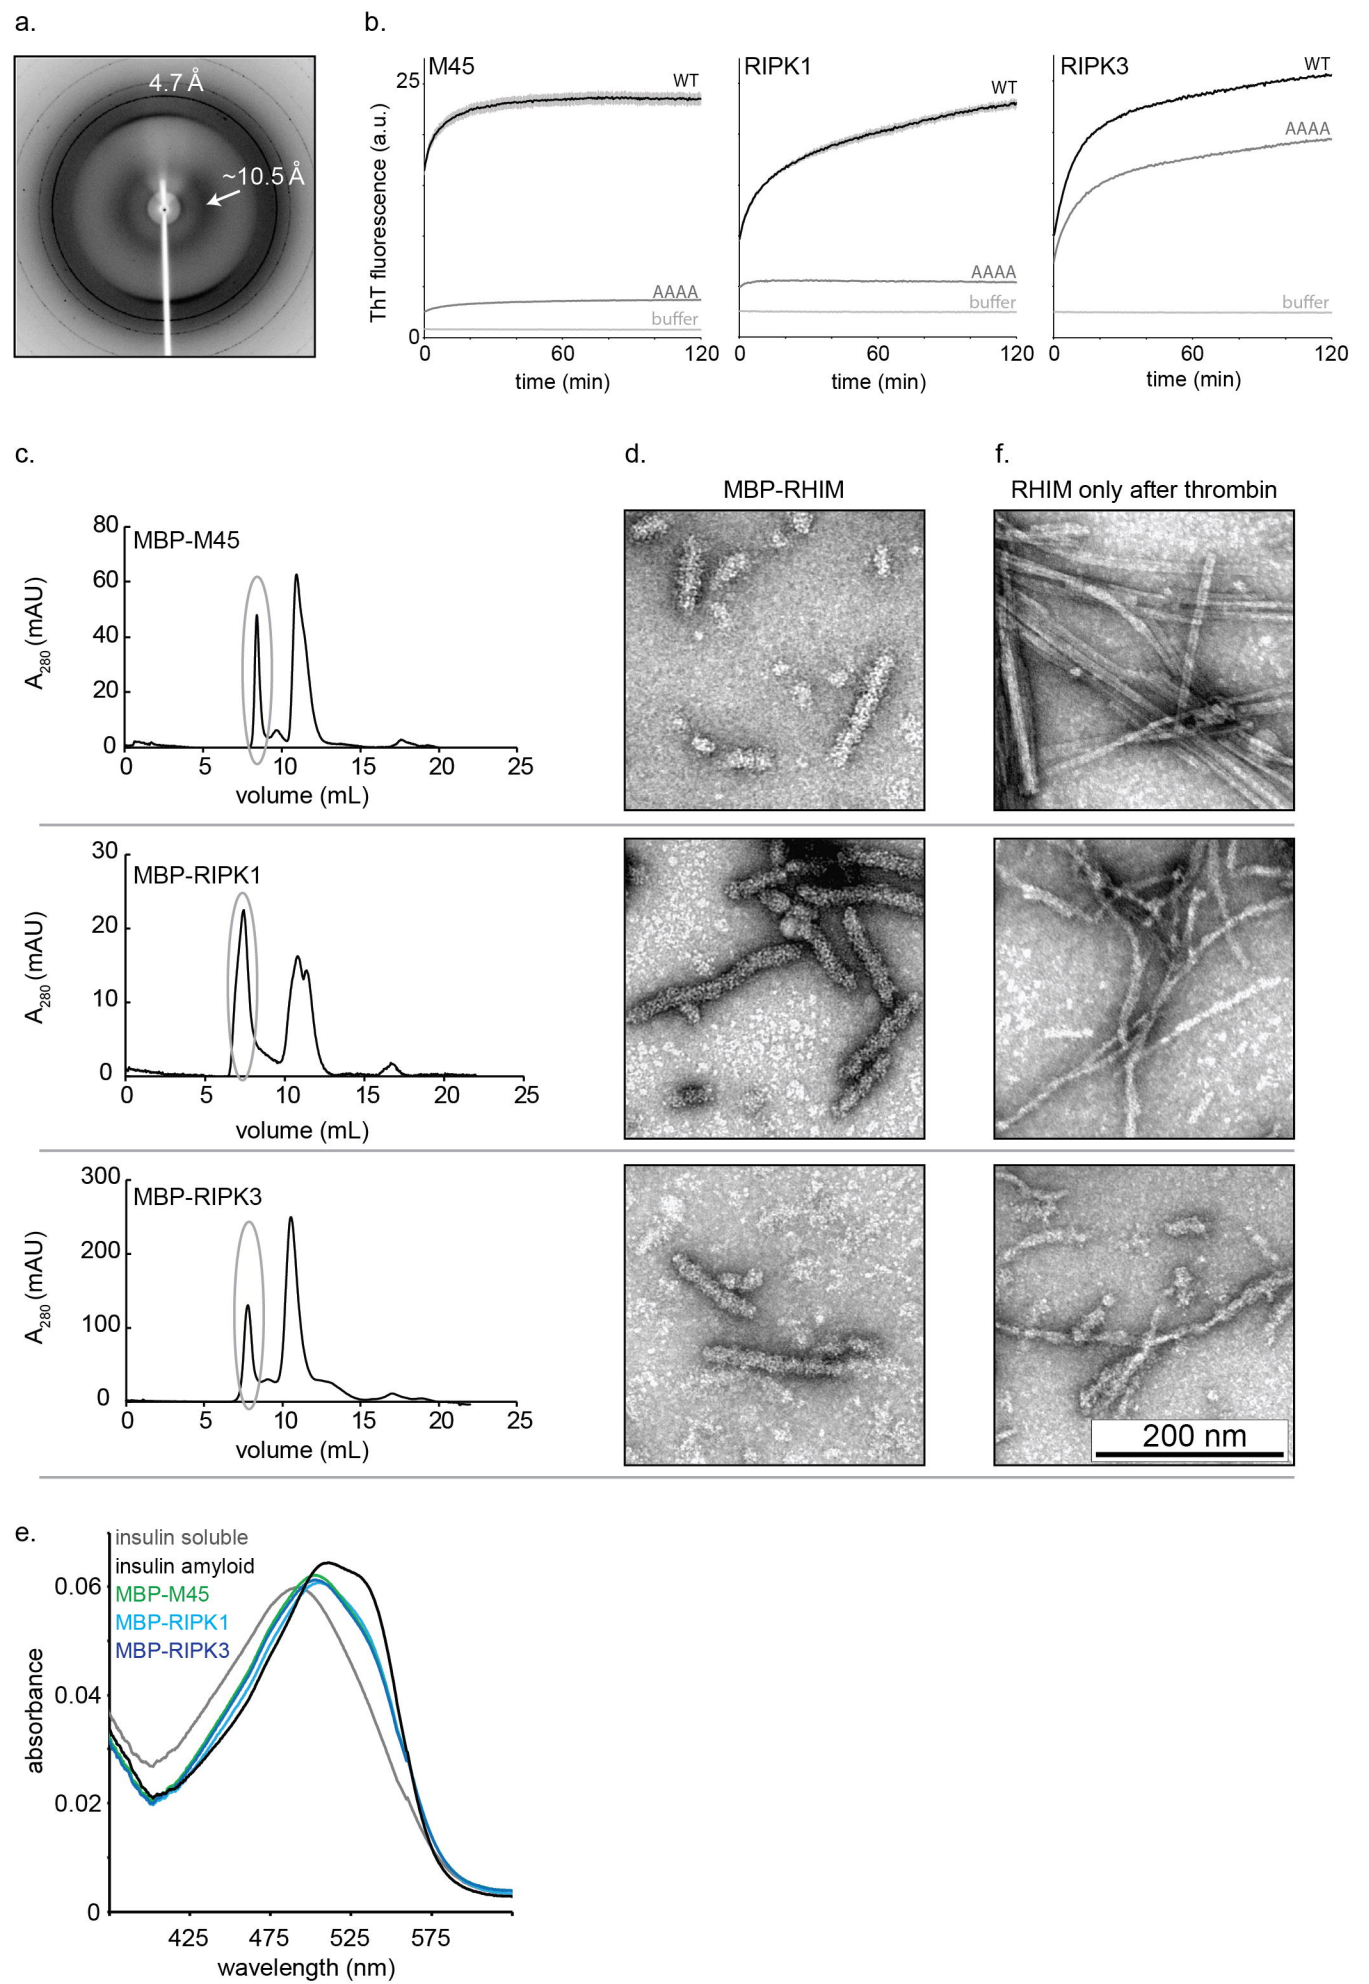

Figure 3.

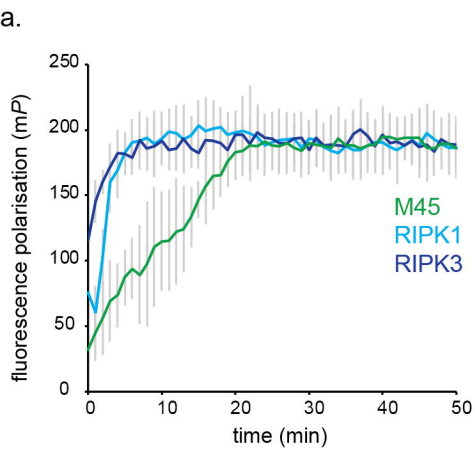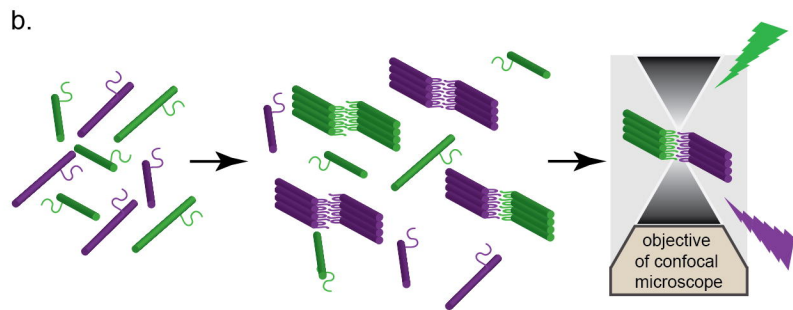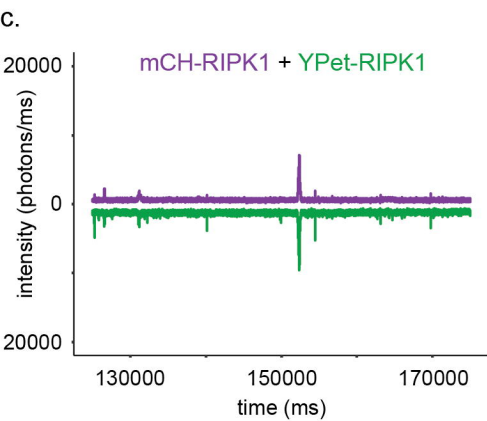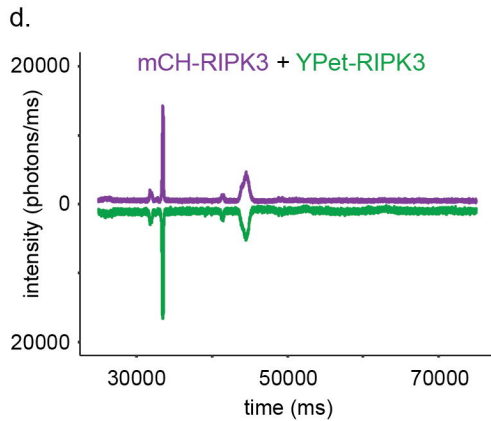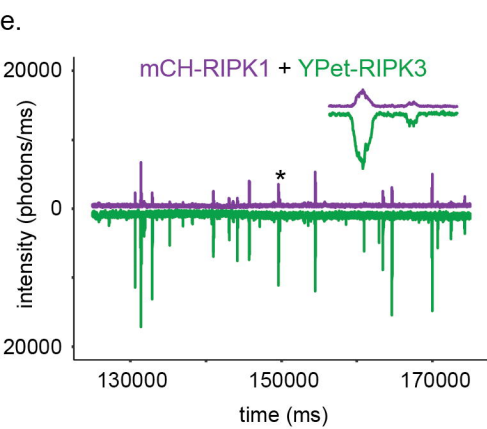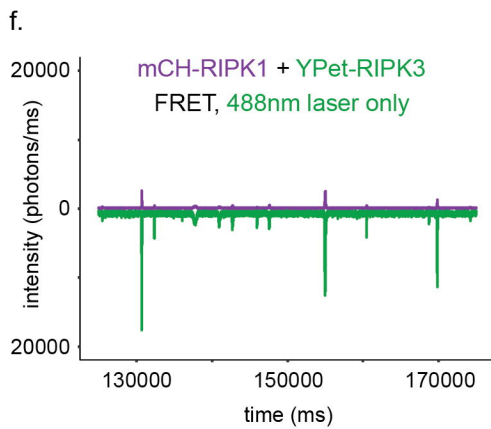

Figure 4.

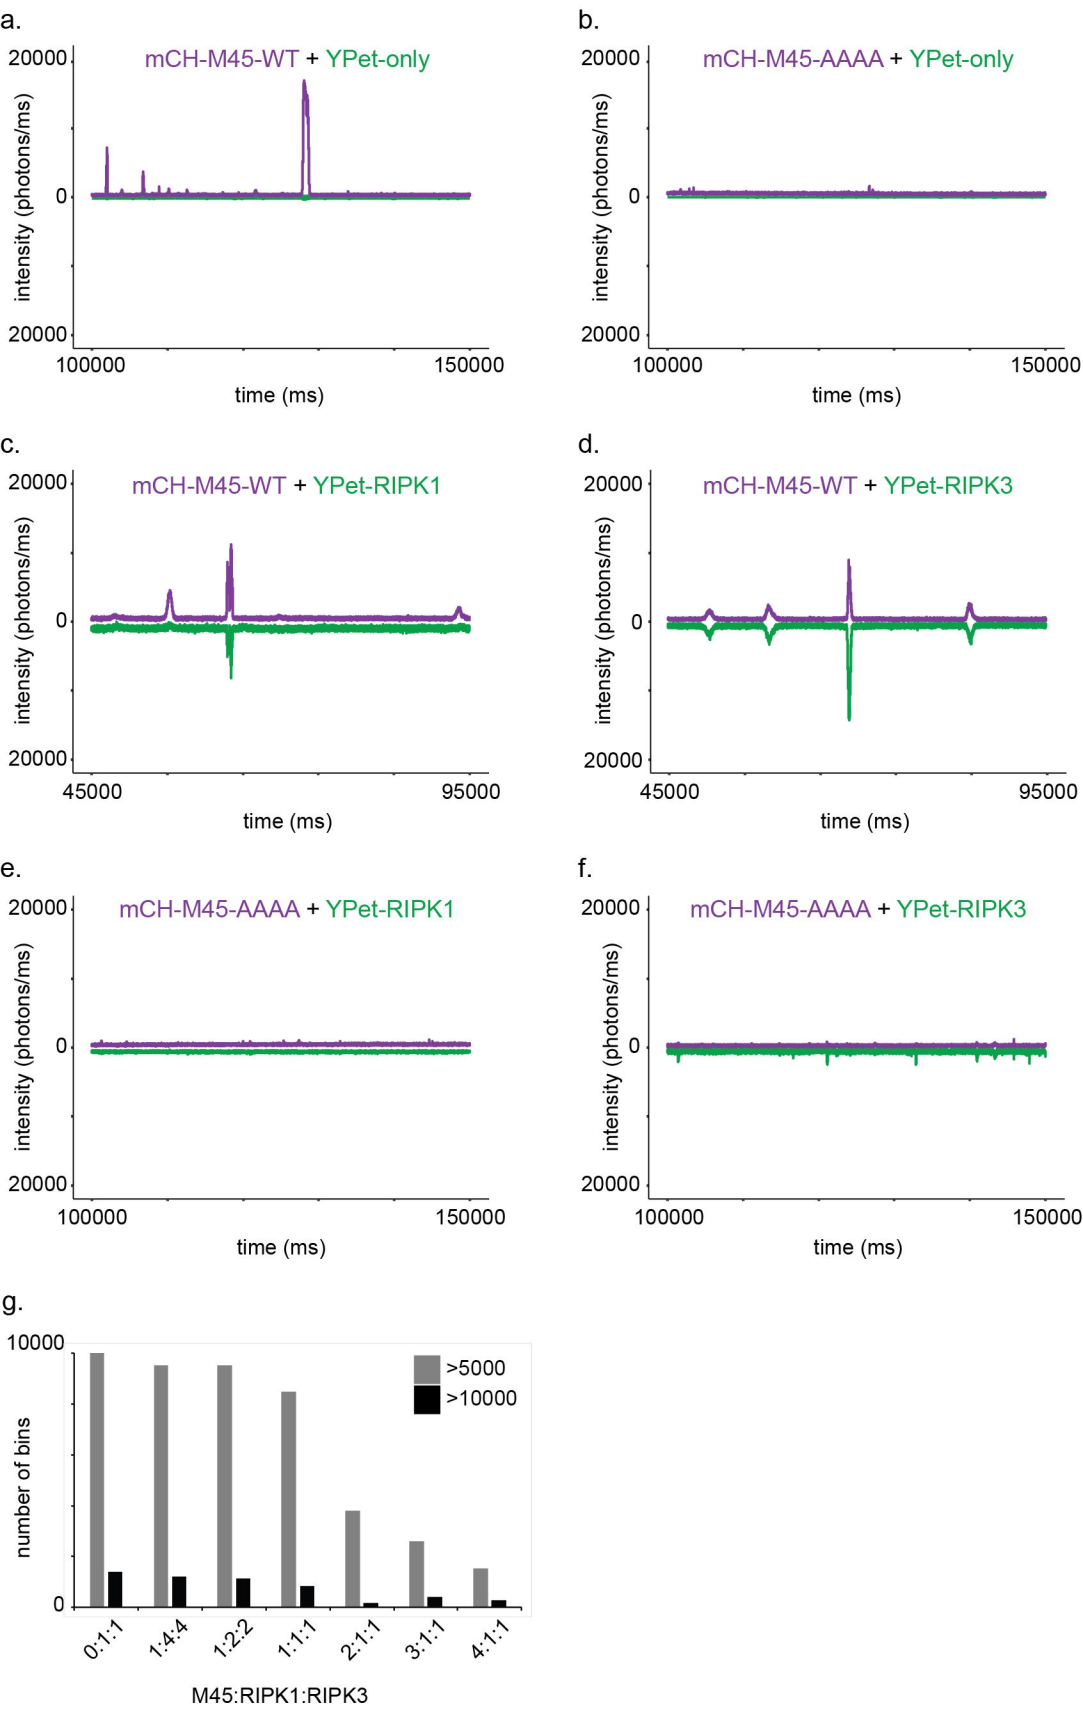

Figure 5.

a.

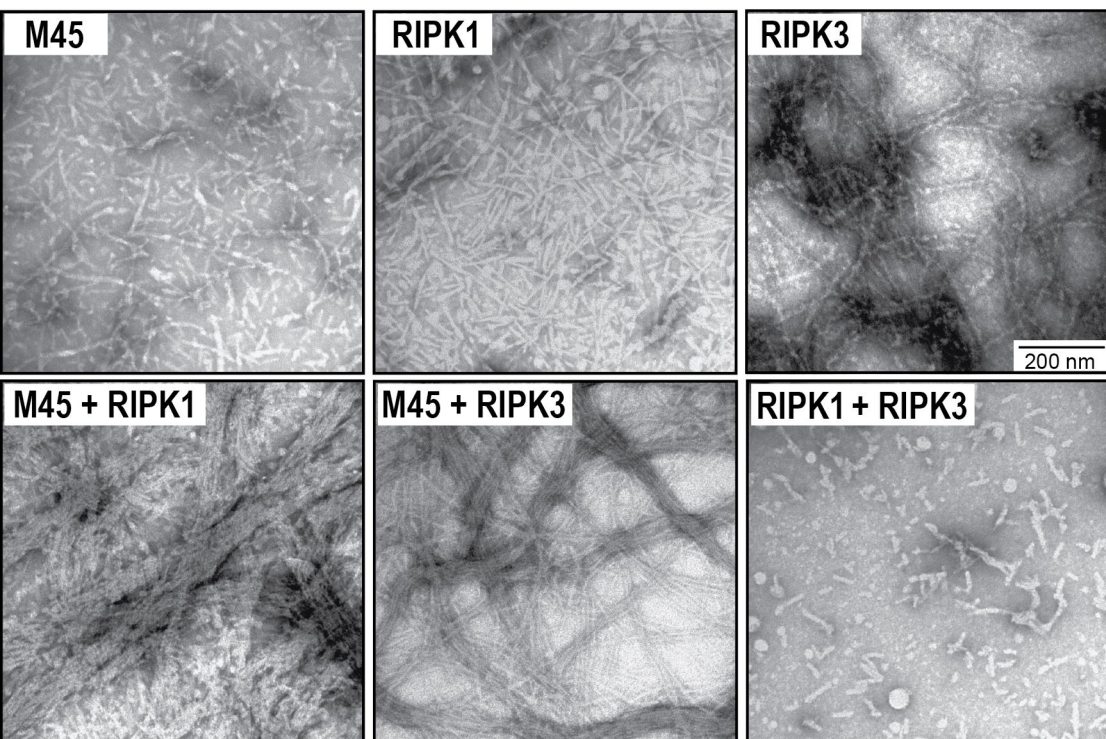

b.

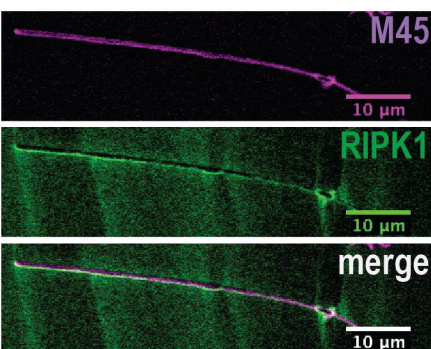

c.

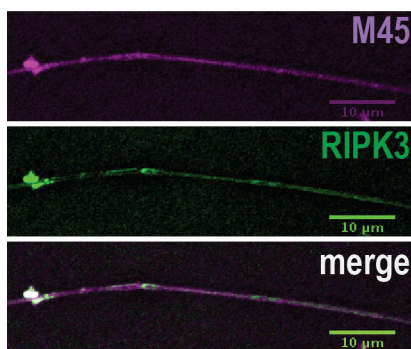

d.

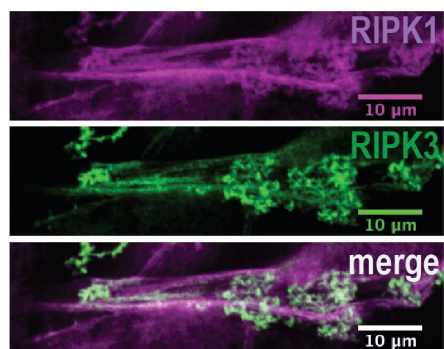

e.

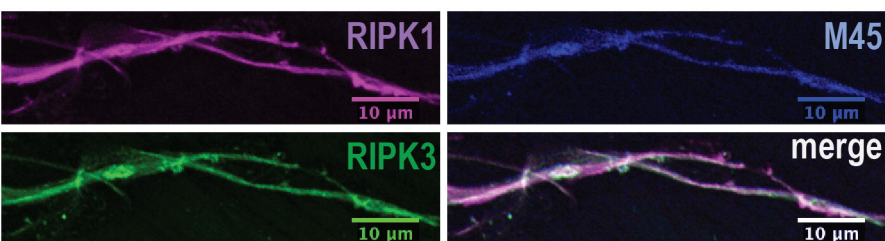

f.

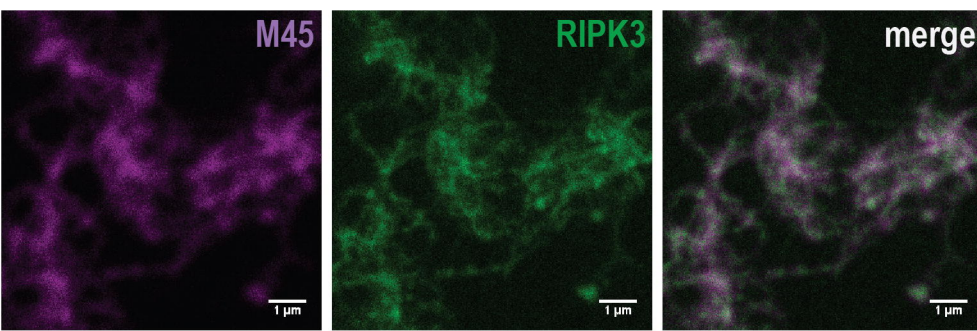

g.

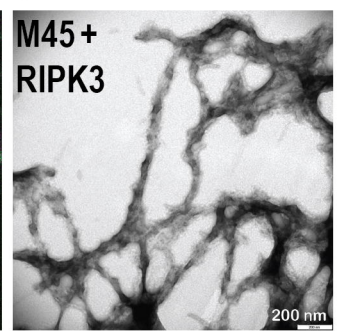

Figure 6.

a.

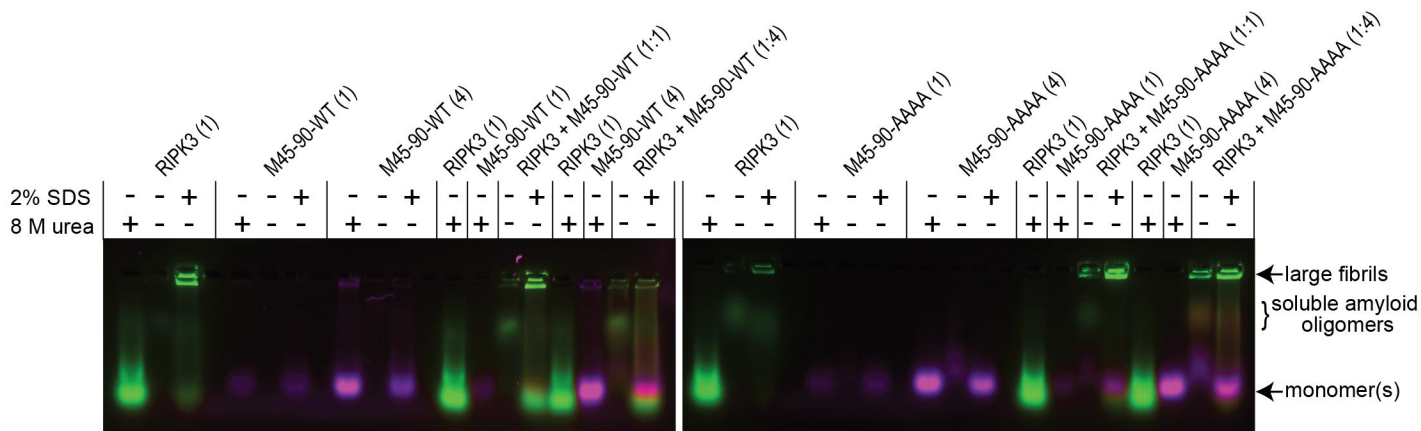

b.

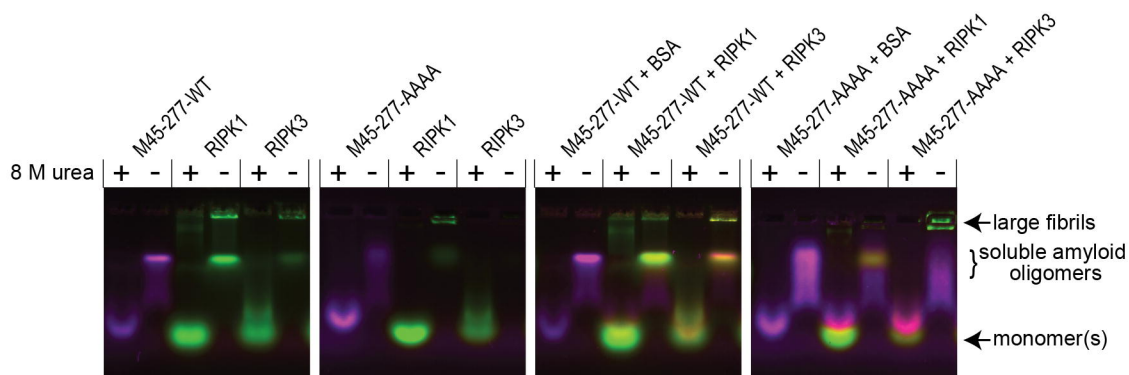

c.

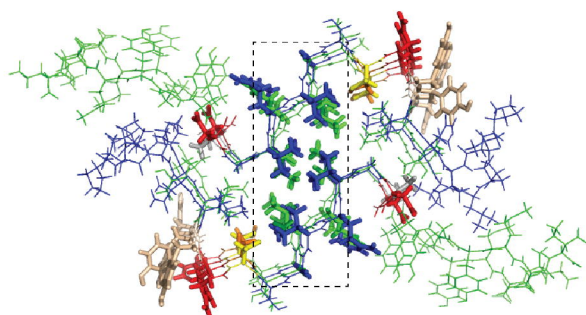

d.

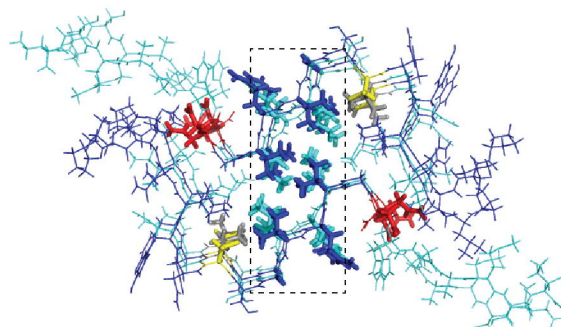

e.

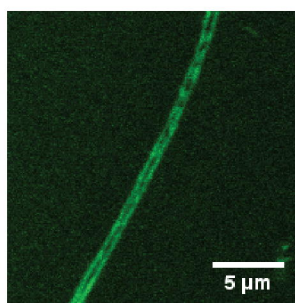

f.

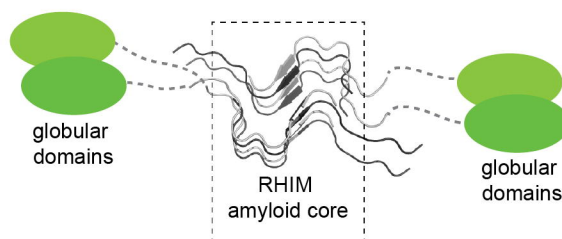

Source: https://www.biorxiv.org/content/biorxiv/early/2018/05/17/324590.full.pdf
